# Supplementary material for: GAS5 protects against osteoporosis by targeting UPF1/SMAD7 axis in osteoblast differentiation
Source: eLife. 2020 Oct 2;9:e59079. doi: 10.7554/eLife.59079 (PMC7609060; doi:10.7554/eLife.59079)
Supplement: Supplementary file 5. [file elife-59079-supp5.xlsx]

## Sheet: Band 1
	Accession	Score	Mass	Matches	Sequences	emPAI
1	sp|P35579|MYH9_HUMAN	713	227646	102 (45)	71 (37)	0.82	Myosin-9 OS=Homo sapiens OX=9606 GN=MYH9 PE=1 SV=4
2	sp|P12111|CO6A3_HUMAN	547	345167	84 (27)	68 (25)	0.28	Collagen alpha-3(VI) chain OS=Homo sapiens OX=9606 GN=COL6A3 PE=1 SV=5
3	sp|P46940|IQGA1_HUMAN	380	189761	50 (23)	40 (22)	0.48	Ras GTPase-activating-like protein IQGAP1 OS=Homo sapiens OX=9606 GN=IQGAP1 PE=1 SV=1
4	sp|P56192|SYMC_HUMAN	363	102249	38 (15)	26 (12)	0.6	Methionine--tRNA ligase, cytoplasmic OS=Homo sapiens OX=9606 GN=MARS PE=1 SV=2
5	sp|Q14764|MVP_HUMAN	303	99551	34 (19)	29 (16)	0.73	Major vault protein OS=Homo sapiens OX=9606 GN=MVP PE=1 SV=4
6	sp|P07814|SYEP_HUMAN	245	172080	45 (20)	36 (17)	0.38	Bifunctional glutamate/proline--tRNA ligase OS=Homo sapiens OX=9606 GN=EPRS PE=1 SV=5
7	sp|P55072|TERA_HUMAN	203	89950	18 (7)	15 (6)	0.24	Transitional endoplasmic reticulum ATPase OS=Homo sapiens OX=9606 GN=VCP PE=1 SV=4
8	tr|J3KR24|J3KR24_HUMAN	191	132820	27 (12)	24 (12)	0.34	Isoleucine--tRNA ligase, cytoplasmic OS=Homo sapiens OX=9606 GN=IARS PE=1 SV=1
9	sp|Q12965|MYO1E_HUMAN	191	127552	38 (10)	33 (10)	0.29	Unconventional myosin-Ie OS=Homo sapiens OX=9606 GN=MYO1E PE=1 SV=2
10	tr|A0A087WVV2|A0A087WVV2_HUMAN	190	103112	38 (13)	34 (13)	0.5	Ribosome-binding protein 1 OS=Homo sapiens OX=9606 GN=RRBP1 PE=1 SV=1
11	sp|P19338|NUCL_HUMAN	187	76625	19 (9)	17 (8)	0.46	Nucleolin OS=Homo sapiens OX=9606 GN=NCL PE=1 SV=3
12	sp|P08238|HS90B_HUMAN	178	83554	17 (8)	13 (6)	0.26	Heat shock protein HSP 90-beta OS=Homo sapiens OX=9606 GN=HSP90AB1 PE=1 SV=4
13	tr|A0A087X253|A0A087X253_HUMAN	175	101953	23 (6)	18 (6)	0.21	AP complex subunit beta OS=Homo sapiens OX=9606 GN=AP2B1 PE=1 SV=1
14	sp|Q9P2J5|SYLC_HUMAN	169	135577	23 (10)	20 (9)	0.24	Leucine--tRNA ligase, cytoplasmic OS=Homo sapiens OX=9606 GN=LARS PE=1 SV=2
15	tr|E9PDF6|E9PDF6_HUMAN	169	129426	30 (10)	25 (9)	0.25	Unconventional myosin-Ib OS=Homo sapiens OX=9606 GN=MYO1B PE=1 SV=1
16	sp|P35606|COPB2_HUMAN	165	103278	31 (9)	24 (9)	0.32	Coatomer subunit beta' OS=Homo sapiens OX=9606 GN=COPB2 PE=1 SV=2
17	tr|F5H6E2|F5H6E2_HUMAN	162	119719	23 (6)	21 (6)	0.18	Unconventional myosin-Ic OS=Homo sapiens OX=9606 GN=MYO1C PE=1 SV=1
18	tr|F8VZ49|F8VZ49_HUMAN	159	25842	11 (4)	7 (3)	0.63	Heterogeneous nuclear ribonucleoprotein A1 (Fragment) OS=Homo sapiens OX=9606 GN=HNRNPA1 PE=1 SV=1
19	sp|Q12797|ASPH_HUMAN	149	86266	35 (12)	24 (11)	0.56	Aspartyl/asparaginyl beta-hydroxylase OS=Homo sapiens OX=9606 GN=ASPH PE=1 SV=3
20	sp|P02751|FINC_HUMAN	141	266052	43 (12)	37 (12)	0.16	Fibronectin OS=Homo sapiens OX=9606 GN=FN1 PE=1 SV=4
21	sp|Q86YZ3|HORN_HUMAN	135	283140	21 (7)	19 (7)	0.08	Hornerin OS=Homo sapiens OX=9606 GN=HRNR PE=1 SV=2
22	sp|P12110|CO6A2_HUMAN	134	109709	17 (9)	14 (9)	0.3	Collagen alpha-2(VI) chain OS=Homo sapiens OX=9606 GN=COL6A2 PE=1 SV=4
23	sp|P63104|1433Z_HUMAN	131	27899	8 (5)	7 (4)	0.57	14-3-3 protein zeta/delta OS=Homo sapiens OX=9606 GN=YWHAZ PE=1 SV=1
24	sp|P68363|TBA1B_HUMAN	131	50804	12 (6)	10 (6)	0.46	Tubulin alpha-1B chain OS=Homo sapiens OX=9606 GN=TUBA1B PE=1 SV=1
25	sp|P22626|ROA2_HUMAN	123	37464	11 (6)	9 (6)	0.66	Heterogeneous nuclear ribonucleoproteins A2/B1 OS=Homo sapiens OX=9606 GN=HNRNPA2B1 PE=1 SV=2
26	sp|Q7KZF4|SND1_HUMAN	122	102618	22 (6)	18 (6)	0.21	Staphylococcal nuclease domain-containing protein 1 OS=Homo sapiens OX=9606 GN=SND1 PE=1 SV=1
27	tr|E7ENZ3|E7ENZ3_HUMAN	121	54270	4 (2)	4 (2)	0.13	T-complex protein 1 subunit epsilon OS=Homo sapiens OX=9606 GN=CCT5 PE=1 SV=1
28	sp|P06899|H2B1J_HUMAN	118	13896	9 (4)	6 (1)	0.93	Histone H2B type 1-J OS=Homo sapiens OX=9606 GN=HIST1H2BJ PE=1 SV=3
29	sp|P15924|DESP_HUMAN	115	334021	36 (10)	34 (9)	0.09	Desmoplakin OS=Homo sapiens OX=9606 GN=DSP PE=1 SV=3
30	sp|P26641|EF1G_HUMAN	112	50429	8 (4)	8 (4)	0.29	Elongation factor 1-gamma OS=Homo sapiens OX=9606 GN=EEF1G PE=1 SV=3
31	sp|Q92900|RENT1_HUMAN	109	125578	20 (6)	16 (6)	0.17	Regulator of nonsense transcripts 1 OS=Homo sapiens OX=9606 GN=UPF1 PE=1 SV=2
32	sp|P62805|H4_HUMAN	108	11360	16 (6)	7 (5)	2.77	Histone H4 OS=Homo sapiens OX=9606 GN=HIST1H4A PE=1 SV=2
33	sp|P06733|ENOA_HUMAN	107	47481	10 (3)	9 (3)	0.22	Alpha-enolase OS=Homo sapiens OX=9606 GN=ENO1 PE=1 SV=2
34	sp|O95786|DDX58_HUMAN	106	108014	13 (4)	12 (4)	0.13	Probable ATP-dependent RNA helicase DDX58 OS=Homo sapiens OX=9606 GN=DDX58 PE=1 SV=2
35	tr|B2R5W2|B2R5W2_HUMAN	105	31986	5 (3)	4 (2)	0.35	Heterogeneous nuclear ribonucleoproteins C1/C2 OS=Homo sapiens OX=9606 GN=HNRNPC PE=1 SV=1
36	tr|Q5JP53|Q5JP53_HUMAN	105	48135	17 (5)	15 (5)	0.39	Tubulin beta chain OS=Homo sapiens OX=9606 GN=TUBB PE=1 SV=1
37	tr|A0A075B6Z2|A0A075B6Z2_HUMAN	104	2220	37 (12)	1 (1)	1.81	T cell receptor alpha joining 56 (Fragment) OS=Homo sapiens OX=9606 GN=TRAJ56 PE=4 SV=1
38	sp|P12277|KCRB_HUMAN	103	42902	7 (3)	6 (3)	0.25	Creatine kinase B-type OS=Homo sapiens OX=9606 GN=CKB PE=1 SV=1
39	sp|P60709|ACTB_HUMAN	103	42052	20 (5)	15 (4)	0.46	Actin, cytoplasmic 1 OS=Homo sapiens OX=9606 GN=ACTB PE=1 SV=1
40	sp|P0DMV8|HS71A_HUMAN	101	70294	12 (6)	11 (6)	0.32	Heat shock 70 kDa protein 1A OS=Homo sapiens OX=9606 GN=HSPA1A PE=1 SV=1
41	sp|P14174|MIF_HUMAN	101	12639	3 (3)	2 (2)	0.61	Macrophage migration inhibitory factor OS=Homo sapiens OX=9606 GN=MIF PE=1 SV=4
42	tr|E7ETU9|E7ETU9_HUMAN	101	81746	9 (4)	9 (4)	0.17	Procollagen-lysine,2-oxoglutarate 5-dioxygenase 2 OS=Homo sapiens OX=9606 GN=PLOD2 PE=1 SV=1
43	sp|Q07065|CKAP4_HUMAN	95	66097	20 (6)	17 (6)	0.34	Cytoskeleton-associated protein 4 OS=Homo sapiens OX=9606 GN=CKAP4 PE=1 SV=2
44	tr|A0A024R4E5|A0A024R4E5_HUMAN	95	141979	40 (7)	29 (7)	0.17	High density lipoprotein binding protein (Vigilin), isoform CRA_a OS=Homo sapiens OX=9606 GN=HDLBP PE=1 SV=1
45	sp|P10809|CH60_HUMAN	94	61187	11 (5)	9 (5)	0.3	60 kDa heat shock protein, mitochondrial OS=Homo sapiens OX=9606 GN=HSPD1 PE=1 SV=2
46	sp|P13639|EF2_HUMAN	94	96246	26 (7)	22 (7)	0.26	Elongation factor 2 OS=Homo sapiens OX=9606 GN=EEF2 PE=1 SV=4
47	tr|A0A087X0X3|A0A087X0X3_HUMAN	89	77746	9 (2)	7 (2)	0.09	Heterogeneous nuclear ribonucleoprotein M OS=Homo sapiens OX=9606 GN=HNRNPM PE=1 SV=1
48	tr|Q5HY54|Q5HY54_HUMAN	88	279115	8 (4)	6 (3)	0.04	Filamin-A OS=Homo sapiens OX=9606 GN=FLNA PE=1 SV=1
49	tr|B4DNK4|B4DNK4_HUMAN	88	50436	12 (5)	10 (5)	0.37	Pyruvate kinase OS=Homo sapiens OX=9606 GN=PKM PE=1 SV=1
50	sp|Q9UKV8|AGO2_HUMAN	87	98400	24 (6)	18 (5)	0.18	Protein argonaute-2 OS=Homo sapiens OX=9606 GN=AGO2 PE=1 SV=3
51	sp|Q13045|FLII_HUMAN	85	146142	7 (4)	6 (4)	0.09	Protein flightless-1 homolog OS=Homo sapiens OX=9606 GN=FLII PE=1 SV=2
52	sp|P43246|MSH2_HUMAN	81	105418	12 (5)	12 (5)	0.17	DNA mismatch repair protein Msh2 OS=Homo sapiens OX=9606 GN=MSH2 PE=1 SV=1
53	sp|P07737|PROF1_HUMAN	76	15216	4 (1)	4 (1)	0.22	Profilin-1 OS=Homo sapiens OX=9606 GN=PFN1 PE=1 SV=2
54	sp|P06748|NPM_HUMAN	75	32726	6 (5)	4 (3)	0.62	Nucleophosmin OS=Homo sapiens OX=9606 GN=NPM1 PE=1 SV=2
55	sp|P42704|LPPRC_HUMAN	75	159003	23 (6)	18 (5)	0.11	Leucine-rich PPR motif-containing protein, mitochondrial OS=Homo sapiens OX=9606 GN=LRPPRC PE=1 SV=3
56	tr|G8JLB6|G8JLB6_HUMAN	75	51482	8 (3)	6 (2)	0.13	Heterogeneous nuclear ribonucleoprotein H OS=Homo sapiens OX=9606 GN=HNRNPH1 PE=1 SV=1
57	sp|P62937|PPIA_HUMAN	73	18229	11 (6)	10 (6)	1.77	Peptidyl-prolyl cis-trans isomerase A OS=Homo sapiens OX=9606 GN=PPIA PE=1 SV=2
58	sp|Q9NSE4|SYIM_HUMAN	73	114688	1 (1)	1 (1)	0.03	Isoleucine--tRNA ligase, mitochondrial OS=Homo sapiens OX=9606 GN=IARS2 PE=1 SV=2
59	sp|Q16643|DREB_HUMAN	72	71842	13 (5)	12 (5)	0.25	Drebrin OS=Homo sapiens OX=9606 GN=DBN1 PE=1 SV=4
60	sp|P78371|TCPB_HUMAN	70	57794	5 (1)	4 (1)	0.06	T-complex protein 1 subunit beta OS=Homo sapiens OX=9606 GN=CCT2 PE=1 SV=4
61	tr|A0A087X0S5|A0A087X0S5_HUMAN	70	109355	30 (7)	15 (6)	0.19	Collagen alpha-1(VI) chain OS=Homo sapiens OX=9606 GN=COL6A1 PE=1 SV=1
62	sp|P60174|TPIS_HUMAN	70	31057	6 (2)	5 (2)	0.23	Triosephosphate isomerase OS=Homo sapiens OX=9606 GN=TPI1 PE=1 SV=3
63	sp|P28066|PSA5_HUMAN	69	26565	1 (1)	1 (1)	0.13	Proteasome subunit alpha type-5 OS=Homo sapiens OX=9606 GN=PSMA5 PE=1 SV=3
64	sp|Q9H0U4|RAB1B_HUMAN	68	22328	3 (1)	3 (1)	0.15	Ras-related protein Rab-1B OS=Homo sapiens OX=9606 GN=RAB1B PE=1 SV=1
65	tr|D6R9P3|D6R9P3_HUMAN	68	30398	6 (4)	4 (3)	0.37	Heterogeneous nuclear ribonucleoprotein A/B OS=Homo sapiens OX=9606 GN=HNRNPAB PE=1 SV=1
66	sp|Q12906|ILF3_HUMAN	66	95678	13 (5)	11 (5)	0.18	Interleukin enhancer-binding factor 3 OS=Homo sapiens OX=9606 GN=ILF3 PE=1 SV=3
67	sp|B5ME19|EIFCL_HUMAN	64	106091	6 (4)	5 (4)	0.13	Eukaryotic translation initiation factor 3 subunit C-like protein OS=Homo sapiens OX=9606 GN=EIF3CL PE=3 SV=1
68	sp|P51659|DHB4_HUMAN	64	80092	3 (1)	3 (1)	0.04	Peroxisomal multifunctional enzyme type 2 OS=Homo sapiens OX=9606 GN=HSD17B4 PE=1 SV=3
69	sp|P30048|PRDX3_HUMAN	64	28017	2 (1)	2 (1)	0.12	Thioredoxin-dependent peroxide reductase, mitochondrial OS=Homo sapiens OX=9606 GN=PRDX3 PE=1 SV=3
70	sp|Q9BPX3|CND3_HUMAN	63	115345	5 (2)	3 (2)	0.06	Condensin complex subunit 3 OS=Homo sapiens OX=9606 GN=NCAPG PE=1 SV=1
71	tr|A8MX94|A8MX94_HUMAN	63	19696	4 (2)	3 (2)	0.37	Glutathione S-transferase P OS=Homo sapiens OX=9606 GN=GSTP1 PE=1 SV=1
72	sp|P04406|G3P_HUMAN	62	36201	16 (2)	12 (2)	0.19	Glyceraldehyde-3-phosphate dehydrogenase OS=Homo sapiens OX=9606 GN=GAPDH PE=1 SV=3
73	tr|Q1JUQ5|Q1JUQ5_HUMAN	60	10112	2 (1)	1 (1)	0.34	Peptidylprolyl isomerase OS=Homo sapiens OX=9606 GN=FKBP1A PE=1 SV=1
74	sp|Q13185|CBX3_HUMAN	60	20969	3 (2)	3 (2)	0.35	Chromobox protein homolog 3 OS=Homo sapiens OX=9606 GN=CBX3 PE=1 SV=4
75	tr|D6RGG3|D6RGG3_HUMAN	60	334193	13 (4)	12 (4)	0.04	Collagen alpha-1(XII) chain OS=Homo sapiens OX=9606 GN=COL12A1 PE=1 SV=1
76	sp|P28074|PSB5_HUMAN	59	28633	1 (1)	1 (1)	0.12	Proteasome subunit beta type-5 OS=Homo sapiens OX=9606 GN=PSMB5 PE=1 SV=3
77	sp|Q13151|ROA0_HUMAN	57	30993	3 (1)	3 (1)	0.11	Heterogeneous nuclear ribonucleoprotein A0 OS=Homo sapiens OX=9606 GN=HNRNPA0 PE=1 SV=1
78	sp|P02452|CO1A1_HUMAN	57	139883	13 (3)	12 (3)	0.07	Collagen alpha-1(I) chain OS=Homo sapiens OX=9606 GN=COL1A1 PE=1 SV=5
79	sp|P30041|PRDX6_HUMAN	57	25133	3 (1)	3 (1)	0.13	Peroxiredoxin-6 OS=Homo sapiens OX=9606 GN=PRDX6 PE=1 SV=3
80	sp|P09874|PARP1_HUMAN	57	113811	7 (1)	7 (1)	0.03	Poly [ADP-ribose] polymerase 1 OS=Homo sapiens OX=9606 GN=PARP1 PE=1 SV=4
81	sp|Q99436|PSB7_HUMAN	56	30288	2 (1)	2 (1)	0.11	Proteasome subunit beta type-7 OS=Homo sapiens OX=9606 GN=PSMB7 PE=1 SV=1
82	tr|H0Y8G5|H0Y8G5_HUMAN	55	29820	5 (2)	4 (2)	0.24	Heterogeneous nuclear ribonucleoprotein D0 (Fragment) OS=Homo sapiens OX=9606 GN=HNRNPD PE=1 SV=8
83	tr|X6RJP6|X6RJP6_HUMAN	55	21244	2 (1)	2 (1)	0.16	Transgelin-2 (Fragment) OS=Homo sapiens OX=9606 GN=TAGLN2 PE=1 SV=1
84	sp|P50991|TCPD_HUMAN	55	58401	3 (1)	3 (1)	0.06	T-complex protein 1 subunit delta OS=Homo sapiens OX=9606 GN=CCT4 PE=1 SV=4
85	tr|A0A286YF22|A0A286YF22_HUMAN	54	56644	6 (2)	6 (2)	0.12	D-3-phosphoglycerate dehydrogenase OS=Homo sapiens OX=9606 GN=PHGDH PE=1 SV=1
86	sp|Q08211|DHX9_HUMAN	54	142181	16 (2)	14 (2)	0.05	ATP-dependent RNA helicase A OS=Homo sapiens OX=9606 GN=DHX9 PE=1 SV=4
87	sp|P55884|EIF3B_HUMAN	54	92823	18 (5)	12 (5)	0.19	Eukaryotic translation initiation factor 3 subunit B OS=Homo sapiens OX=9606 GN=EIF3B PE=1 SV=3
88	sp|P25705|ATPA_HUMAN	52	59828	6 (2)	6 (2)	0.11	ATP synthase subunit alpha, mitochondrial OS=Homo sapiens OX=9606 GN=ATP5F1A PE=1 SV=1
89	sp|P05121|PAI1_HUMAN	52	45088	2 (2)	2 (2)	0.15	Plasminogen activator inhibitor 1 OS=Homo sapiens OX=9606 GN=SERPINE1 PE=1 SV=1
90	sp|Q04837|SSBP_HUMAN	52	17249	2 (2)	2 (2)	0.43	Single-stranded DNA-binding protein, mitochondrial OS=Homo sapiens OX=9606 GN=SSBP1 PE=1 SV=1
91	tr|A0A087WTP3|A0A087WTP3_HUMAN	52	73438	4 (2)	3 (2)	0.09	Far upstream element-binding protein 2 OS=Homo sapiens OX=9606 GN=KHSRP PE=1 SV=1
92	tr|A0A0R4J2E8|A0A0R4J2E8_HUMAN	51	95078	5 (1)	5 (1)	0.03	Matrin-3 OS=Homo sapiens OX=9606 GN=MATR3 PE=1 SV=1
93	tr|G3XAL0|G3XAL0_HUMAN	49	24921	2 (2)	2 (2)	0.29	Malate dehydrogenase OS=Homo sapiens OX=9606 GN=MDH2 PE=1 SV=1
94	sp|Q02413|DSG1_HUMAN	49	114702	12 (3)	9 (2)	0.06	Desmoglein-1 OS=Homo sapiens OX=9606 GN=DSG1 PE=1 SV=2
95	tr|A0A0A0MSI0|A0A0A0MSI0_HUMAN	48	19135	5 (2)	4 (2)	0.38	Peroxiredoxin-1 (Fragment) OS=Homo sapiens OX=9606 GN=PRDX1 PE=1 SV=1
96	tr|A0A075B7A0|A0A075B7A0_HUMAN	48	16245	1 (1)	1 (1)	0.21	60S ribosomal protein L18 OS=Homo sapiens OX=9606 GN=RPL18 PE=1 SV=1
97	sp|Q8NC51|PAIRB_HUMAN	48	44995	1 (1)	1 (1)	0.07	Plasminogen activator inhibitor 1 RNA-binding protein OS=Homo sapiens OX=9606 GN=SERBP1 PE=1 SV=2
98	tr|G3V213|G3V213_HUMAN	47	14486	1 (1)	1 (1)	0.23	Adenylate kinase 2, isoform CRA_a OS=Homo sapiens OX=9606 GN=AK2 PE=1 SV=1
99	tr|E9PB61|E9PB61_HUMAN	47	27541	2 (2)	2 (2)	0.26	THO complex subunit 4 OS=Homo sapiens OX=9606 GN=ALYREF PE=1 SV=1
100	tr|A0A1W2PP35|A0A1W2PP35_HUMAN	47	81283	10 (2)	8 (2)	0.08	Heterogeneous nuclear ribonucleoprotein U (Fragment) OS=Homo sapiens OX=9606 GN=HNRNPU PE=1 SV=1
101	tr|H9KV75|H9KV75_HUMAN	46	95279	7 (2)	6 (2)	0.07	Alpha-actinin-1 OS=Homo sapiens OX=9606 GN=ACTN1 PE=1 SV=1
102	sp|P06576|ATPB_HUMAN	40	56525	10 (2)	9 (2)	0.12	ATP synthase subunit beta, mitochondrial OS=Homo sapiens OX=9606 GN=ATP5F1B PE=1 SV=3
103	sp|P13489|RINI_HUMAN	45	51766	2 (1)	2 (1)	0.06	Ribonuclease inhibitor OS=Homo sapiens OX=9606 GN=RNH1 PE=1 SV=2
104	sp|P36578|RL4_HUMAN	45	47953	6 (2)	5 (2)	0.14	60S ribosomal protein L4 OS=Homo sapiens OX=9606 GN=RPL4 PE=1 SV=5
105	sp|P61970|NTF2_HUMAN	45	14640	1 (1)	1 (1)	0.23	Nuclear transport factor 2 OS=Homo sapiens OX=9606 GN=NUTF2 PE=1 SV=1
106	tr|A0A0A0MR02|A0A0A0MR02_HUMAN	44	30842	4 (1)	3 (1)	0.11	Voltage-dependent anion-selective channel protein 2 (Fragment) OS=Homo sapiens OX=9606 GN=VDAC2 PE=1 SV=1
107	sp|Q8TF72|SHRM3_HUMAN	44	218321	3 (1)	3 (1)	0.01	Protein Shroom3 OS=Homo sapiens OX=9606 GN=SHROOM3 PE=1 SV=2
108	tr|H0Y8L7|H0Y8L7_HUMAN	43	22294	1 (1)	1 (1)	0.15	40S ribosomal protein S3a (Fragment) OS=Homo sapiens OX=9606 GN=RPS3A PE=1 SV=1
109	sp|Q9P2I0|CPSF2_HUMAN	43	89286	2 (1)	2 (1)	0.04	Cleavage and polyadenylation specificity factor subunit 2 OS=Homo sapiens OX=9606 GN=CPSF2 PE=1 SV=2
110	sp|P78527|PRKDC_HUMAN	42	473749	11 (1)	11 (1)	0.01	DNA-dependent protein kinase catalytic subunit OS=Homo sapiens OX=9606 GN=PRKDC PE=1 SV=3
111	sp|P07195|LDHB_HUMAN	42	36900	6 (3)	4 (2)	0.29	L-lactate dehydrogenase B chain OS=Homo sapiens OX=9606 GN=LDHB PE=1 SV=2
112	sp|P10599|THIO_HUMAN	42	12015	2 (1)	2 (1)	0.29	Thioredoxin OS=Homo sapiens OX=9606 GN=TXN PE=1 SV=3
113	sp|P22314|UBA1_HUMAN	42	118858	5 (1)	5 (1)	0.03	Ubiquitin-like modifier-activating enzyme 1 OS=Homo sapiens OX=9606 GN=UBA1 PE=1 SV=3
114	tr|A0A0D9SFS3|A0A0D9SFS3_HUMAN	42	114439	12 (1)	10 (1)	0.03	2-oxoglutarate dehydrogenase, mitochondrial OS=Homo sapiens OX=9606 GN=OGDH PE=1 SV=1
115	tr|A0A087X1X7|A0A087X1X7_HUMAN	42	69696	2 (1)	2 (1)	0.05	Elongation factor 1-delta OS=Homo sapiens OX=9606 GN=EEF1D PE=1 SV=1
116	sp|P18669|PGAM1_HUMAN	42	28900	5 (1)	3 (1)	0.12	Phosphoglycerate mutase 1 OS=Homo sapiens OX=9606 GN=PGAM1 PE=1 SV=2
117	sp|Q14644|RASA3_HUMAN	41	96836	3 (1)	3 (1)	0.03	Ras GTPase-activating protein 3 OS=Homo sapiens OX=9606 GN=RASA3 PE=1 SV=3
118	tr|A0A024R4M0|A0A024R4M0_HUMAN	41	22635	2 (1)	1 (1)	0.15	40S ribosomal protein S9 OS=Homo sapiens OX=9606 GN=RPS9 PE=1 SV=1
119	sp|P35232|PHB_HUMAN	41	29843	3 (1)	2 (1)	0.11	Prohibitin OS=Homo sapiens OX=9606 GN=PHB PE=1 SV=1
120	sp|P68104|EF1A1_HUMAN	38	50451	11 (2)	8 (2)	0.13	Elongation factor 1-alpha 1 OS=Homo sapiens OX=9606 GN=EEF1A1 PE=1 SV=1
121	sp|P81605|DCD_HUMAN	40	11391	3 (2)	3 (2)	0.69	Dermcidin OS=Homo sapiens OX=9606 GN=DCD PE=1 SV=2
122	sp|P61604|CH10_HUMAN	40	10925	2 (1)	2 (1)	0.32	10 kDa heat shock protein, mitochondrial OS=Homo sapiens OX=9606 GN=HSPE1 PE=1 SV=2
123	sp|Q14152|EIF3A_HUMAN	40	166867	6 (1)	4 (1)	0.02	Eukaryotic translation initiation factor 3 subunit A OS=Homo sapiens OX=9606 GN=EIF3A PE=1 SV=1
124	sp|Q15233|NONO_HUMAN	39	54311	12 (3)	9 (2)	0.19	Non-POU domain-containing octamer-binding protein OS=Homo sapiens OX=9606 GN=NONO PE=1 SV=4
125	tr|J3KPS3|J3KPS3_HUMAN	39	40249	7 (2)	4 (2)	0.17	Fructose-bisphosphate aldolase OS=Homo sapiens OX=9606 GN=ALDOA PE=1 SV=1
126	sp|P0DME0|SETLP_HUMAN	39	34861	1 (1)	1 (1)	0.1	Protein SETSIP OS=Homo sapiens OX=9606 GN=SETSIP PE=1 SV=1
127	sp|Q7L2E3|DHX30_HUMAN	38	134938	9 (3)	8 (2)	0.05	Putative ATP-dependent RNA helicase DHX30 OS=Homo sapiens OX=9606 GN=DHX30 PE=1 SV=1
128	sp|O60506|HNRPQ_HUMAN	38	69788	5 (1)	5 (1)	0.05	Heterogeneous nuclear ribonucleoprotein Q OS=Homo sapiens OX=9606 GN=SYNCRIP PE=1 SV=2
129	sp|P27824|CALX_HUMAN	38	67982	2 (1)	2 (1)	0.05	Calnexin OS=Homo sapiens OX=9606 GN=CANX PE=1 SV=2
130	sp|P62241|RS8_HUMAN	38	24475	3 (1)	3 (1)	0.14	40S ribosomal protein S8 OS=Homo sapiens OX=9606 GN=RPS8 PE=1 SV=2
131	sp|Q9BZK3|NACP1_HUMAN	37	23292	1 (1)	1 (1)	0.14	Putative nascent polypeptide-associated complex subunit alpha-like protein OS=Homo sapiens OX=9606 GN=NACAP1 PE=5 SV=1
132	tr|J3QSW6|J3QSW6_HUMAN	37	343184	3 (1)	3 (1)	0.01	Kalirin OS=Homo sapiens OX=9606 GN=KALRN PE=1 SV=1
133	sp|P12236|ADT3_HUMAN	37	33073	4 (1)	4 (1)	0.1	ADP/ATP translocase 3 OS=Homo sapiens OX=9606 GN=SLC25A6 PE=1 SV=4
134	tr|H7C422|H7C422_HUMAN	37	35345	3 (1)	3 (1)	0.09	60S ribosomal protein L3 (Fragment) OS=Homo sapiens OX=9606 GN=RPL3 PE=1 SV=1
135	tr|E7ERC4|E7ERC4_HUMAN	37	21486	1 (1)	1 (1)	0.16	Lupus La protein (Fragment) OS=Homo sapiens OX=9606 GN=SSB PE=1 SV=1
136	tr|A0A087WTS8|A0A087WTS8_HUMAN	36	53364	3 (1)	3 (1)	0.06	Heat shock 70 kDa protein 4 OS=Homo sapiens OX=9606 GN=HSPA4 PE=1 SV=1
137	tr|A0A0D9SEN1|A0A0D9SEN1_HUMAN	35	88213	6 (2)	5 (2)	0.08	Prolyl endopeptidase FAP OS=Homo sapiens OX=9606 GN=FAP PE=1 SV=1
138	sp|Q5SW79|CE170_HUMAN	35	175586	3 (1)	3 (1)	0.02	Centrosomal protein of 170 kDa OS=Homo sapiens OX=9606 GN=CEP170 PE=1 SV=1
139	tr|H0Y9R4|H0Y9R4_HUMAN	35	10264	2 (1)	2 (1)	0.34	60S ribosomal protein L9 (Fragment) OS=Homo sapiens OX=9606 GN=RPL9 PE=1 SV=1
140	sp|P53618|COPB_HUMAN	34	108214	7 (1)	7 (1)	0.03	Coatomer subunit beta OS=Homo sapiens OX=9606 GN=COPB1 PE=1 SV=3
141	sp|P40939|ECHA_HUMAN	34	83688	1 (1)	1 (1)	0.04	Trifunctional enzyme subunit alpha, mitochondrial OS=Homo sapiens OX=9606 GN=HADHA PE=1 SV=2
142	sp|Q15020|SART3_HUMAN	34	110721	4 (2)	4 (2)	0.06	Squamous cell carcinoma antigen recognized by T-cells 3 OS=Homo sapiens OX=9606 GN=SART3 PE=1 SV=1
143	sp|P51116|FXR2_HUMAN	33	74520	4 (1)	3 (1)	0.04	Fragile X mental retardation syndrome-related protein 2 OS=Homo sapiens OX=9606 GN=FXR2 PE=1 SV=2
144	tr|G3V241|G3V241_HUMAN	33	15985	1 (1)	1 (1)	0.21	Serine hydroxymethyltransferase, mitochondrial (Fragment) OS=Homo sapiens OX=9606 GN=SHMT2 PE=1 SV=1
145	tr|A0A0G2JM88|A0A0G2JM88_HUMAN	33	23012	1 (1)	1 (1)	0.15	Methylcrotonoyl-CoA carboxylase beta chain, mitochondrial (Fragment) OS=Homo sapiens OX=9606 GN=MCCC2 PE=1 SV=1
146	tr|A8MUD9|A8MUD9_HUMAN	33	24474	3 (1)	2 (1)	0.14	60S ribosomal protein L7 OS=Homo sapiens OX=9606 GN=RPL7 PE=1 SV=1
147	sp|P0DOY2|IGLC2_HUMAN	33	11458	1 (1)	1 (1)	0.3	Immunoglobulin lambda constant 2 OS=Homo sapiens OX=9606 GN=IGLC2 PE=1 SV=1
148	tr|H0YHX9|H0YHX9_HUMAN	33	22930	2 (1)	2 (1)	0.15	Nascent polypeptide-associated complex subunit alpha (Fragment) OS=Homo sapiens OX=9606 GN=NACA PE=1 SV=1
149	tr|E7EPB3|E7EPB3_HUMAN	33	14663	1 (1)	1 (1)	0.23	60S ribosomal protein L14 OS=Homo sapiens OX=9606 GN=RPL14 PE=1 SV=1
150	sp|P24534|EF1B_HUMAN	32	24919	1 (1)	1 (1)	0.13	Elongation factor 1-beta OS=Homo sapiens OX=9606 GN=EEF1B2 PE=1 SV=3
151	sp|P51991|ROA3_HUMAN	32	39799	4 (1)	2 (1)	0.08	Heterogeneous nuclear ribonucleoprotein A3 OS=Homo sapiens OX=9606 GN=HNRNPA3 PE=1 SV=2
152	tr|H7C4C8|H7C4C8_HUMAN	32	35913	3 (1)	3 (1)	0.09	T-complex protein 1 subunit theta (Fragment) OS=Homo sapiens OX=9606 GN=CCT8 PE=1 SV=1
153	sp|P11586|C1TC_HUMAN	32	102180	8 (1)	7 (1)	0.03	C-1-tetrahydrofolate synthase, cytoplasmic OS=Homo sapiens OX=9606 GN=MTHFD1 PE=1 SV=3
154	tr|A0A087WTA8|A0A087WTA8_HUMAN	31	129586	1 (1)	1 (1)	0.03	Collagen alpha-2(I) chain OS=Homo sapiens OX=9606 GN=COL1A2 PE=1 SV=1
155	sp|Q5D862|FILA2_HUMAN	31	249296	3 (1)	3 (1)	0.01	Filaggrin-2 OS=Homo sapiens OX=9606 GN=FLG2 PE=1 SV=1
156	tr|A0A087WTT1|A0A087WTT1_HUMAN	31	58727	6 (1)	5 (1)	0.06	Polyadenylate-binding protein OS=Homo sapiens OX=9606 GN=PABPC1 PE=1 SV=1
157	sp|P53621|COPA_HUMAN	31	139797	6 (1)	4 (1)	0.02	Coatomer subunit alpha OS=Homo sapiens OX=9606 GN=COPA PE=1 SV=2
158	sp|P02768|ALBU_HUMAN	31	71317	10 (3)	8 (2)	0.09	Serum albumin OS=Homo sapiens OX=9606 GN=ALB PE=1 SV=2
159	sp|P62847|RS24_HUMAN	30	15413	2 (1)	2 (1)	0.22	40S ribosomal protein S24 OS=Homo sapiens OX=9606 GN=RPS24 PE=1 SV=1
160	tr|E9PI86|E9PI86_HUMAN	30	28293	1 (1)	1 (1)	0.12	Nuclear autoantigenic sperm protein (Fragment) OS=Homo sapiens OX=9606 GN=NASP PE=1 SV=1
161	tr|J3QT83|J3QT83_HUMAN	30	92740	8 (1)	7 (1)	0.04	Collagen alpha-1(XIV) chain (Fragment) OS=Homo sapiens OX=9606 GN=COL14A1 PE=1 SV=1
162	sp|P05141|ADT2_HUMAN	30	33059	3 (1)	3 (1)	0.1	ADP/ATP translocase 2 OS=Homo sapiens OX=9606 GN=SLC25A5 PE=1 SV=7
163	tr|Q5JXR5|Q5JXR5_HUMAN	29	108657	2 (2)	2 (2)	0.06	NFX1-type zinc finger-containing protein 1 (Fragment) OS=Homo sapiens OX=9606 GN=ZNFX1 PE=1 SV=1
164	tr|A0A087WYT3|A0A087WYT3_HUMAN	29	19428	1 (1)	1 (1)	0.17	Prostaglandin E synthase 3 OS=Homo sapiens OX=9606 GN=PTGES3 PE=1 SV=1
165	tr|J3KTA4|J3KTA4_HUMAN	29	69557	2 (1)	2 (1)	0.05	Probable ATP-dependent RNA helicase DDX5 OS=Homo sapiens OX=9606 GN=DDX5 PE=1 SV=1
166	sp|P00338|LDHA_HUMAN	28	36950	5 (2)	4 (2)	0.19	L-lactate dehydrogenase A chain OS=Homo sapiens OX=9606 GN=LDHA PE=1 SV=2
167	sp|O14556|G3PT_HUMAN	27	44815	2 (1)	2 (1)	0.07	Glyceraldehyde-3-phosphate dehydrogenase, testis-specific OS=Homo sapiens OX=9606 GN=GAPDHS PE=1 SV=2
168	sp|Q8NHW5|RLA0L_HUMAN	27	34514	2 (1)	1 (1)	0.1	60S acidic ribosomal protein P0-like OS=Homo sapiens OX=9606 GN=RPLP0P6 PE=5 SV=1
169	sp|P26373|RL13_HUMAN	27	24304	4 (1)	4 (1)	0.14	60S ribosomal protein L13 OS=Homo sapiens OX=9606 GN=RPL13 PE=1 SV=4
170	sp|Q8NCA9|ZN784_HUMAN	27	35071	1 (1)	1 (1)	0.09	Zinc finger protein 784 OS=Homo sapiens OX=9606 GN=ZNF784 PE=1 SV=1
171	tr|A0A0G2JQT1|A0A0G2JQT1_HUMAN	26	101145	3 (1)	3 (1)	0.03	Cytoplasmic FMR1-interacting protein 1 (Fragment) OS=Homo sapiens OX=9606 GN=CYFIP1 PE=1 SV=4
172	sp|P12273|PIP_HUMAN	26	16847	1 (1)	1 (1)	0.2	Prolactin-inducible protein OS=Homo sapiens OX=9606 GN=PIP PE=1 SV=1
173	sp|Q9Y2A7|NCKP1_HUMAN	26	130018	4 (1)	4 (1)	0.03	Nck-associated protein 1 OS=Homo sapiens OX=9606 GN=NCKAP1 PE=1 SV=1
174	sp|Q9NRR5|UBQL4_HUMAN	25	63869	3 (1)	3 (1)	0.05	Ubiquilin-4 OS=Homo sapiens OX=9606 GN=UBQLN4 PE=1 SV=2
175	sp|P16615|AT2A2_HUMAN	24	116336	3 (1)	3 (1)	0.03	Sarcoplasmic/endoplasmic reticulum calcium ATPase 2 OS=Homo sapiens OX=9606 GN=ATP2A2 PE=1 SV=1
176	tr|Q5JXI8|Q5JXI8_HUMAN	24	30965	1 (1)	1 (1)	0.11	Four and a half LIM domains protein 1 (Fragment) OS=Homo sapiens OX=9606 GN=FHL1 PE=1 SV=1
177	sp|P08708|RS17_HUMAN	24	15597	2 (1)	2 (1)	0.22	40S ribosomal protein S17 OS=Homo sapiens OX=9606 GN=RPS17 PE=1 SV=2
178	tr|B4E2Q0|B4E2Q0_HUMAN	24	105786	2 (1)	2 (1)	0.03	Calcium-transporting ATPase OS=Homo sapiens OX=9606 GN=ATP2C1 PE=1 SV=1
179	sp|Q92917|GPKOW_HUMAN	23	52425	3 (1)	1 (1)	0.06	G-patch domain and KOW motifs-containing protein OS=Homo sapiens OX=9606 GN=GPKOW PE=1 SV=2
180	sp|Q8IWT6|LRC8A_HUMAN	23	95051	7 (1)	6 (1)	0.03	Volume-regulated anion channel subunit LRRC8A OS=Homo sapiens OX=9606 GN=LRRC8A PE=1 SV=1
181	sp|Q8TC07|TBC15_HUMAN	22	80352	1 (1)	1 (1)	0.04	TBC1 domain family member 15 OS=Homo sapiens OX=9606 GN=TBC1D15 PE=1 SV=2
182	tr|G3V279|G3V279_HUMAN	22	8369	1 (1)	1 (1)	0.42	Enhancer of rudimentary homolog OS=Homo sapiens OX=9606 GN=ERH PE=1 SV=1
183	tr|A0A1W2PNX8|A0A1W2PNX8_HUMAN	22	120030	7 (1)	5 (1)	0.03	Protein unc-45 homolog A OS=Homo sapiens OX=9606 GN=UNC45A PE=1 SV=1
184	sp|P25311|ZA2G_HUMAN	22	34465	2 (1)	1 (1)	0.1	Zinc-alpha-2-glycoprotein OS=Homo sapiens OX=9606 GN=AZGP1 PE=1 SV=2
185	tr|A0A0B4J259|A0A0B4J259_HUMAN	21	15661	4 (1)	3 (1)	0.22	Lysozyme OS=Homo sapiens OX=9606 GN=LYZ PE=1 SV=1
186	tr|A0A087X2H1|A0A087X2H1_HUMAN	21	292417	8 (1)	6 (1)	0.01	E3 ubiquitin-protein ligase HECTD1 OS=Homo sapiens OX=9606 GN=HECTD1 PE=1 SV=1
187	tr|J3JS69|J3JS69_HUMAN	21	9761	1 (1)	1 (1)	0.36	40S ribosomal protein S18 OS=Homo sapiens OX=9606 GN=RPS18 PE=1 SV=1
188	tr|G3V1A4|G3V1A4_HUMAN	20	17029	2 (1)	2 (1)	0.2	Cofilin 1 (Non-muscle), isoform CRA_a OS=Homo sapiens OX=9606 GN=CFL1 PE=1 SV=1
189	tr|D6RF62|D6RF62_HUMAN	19	37658	1 (1)	1 (1)	0.09	Multifunctional protein ADE2 OS=Homo sapiens OX=9606 GN=PAICS PE=1 SV=1
190	sp|O00203|AP3B1_HUMAN	19	121815	2 (1)	2 (1)	0.03	AP-3 complex subunit beta-1 OS=Homo sapiens OX=9606 GN=AP3B1 PE=1 SV=3
191	sp|Q14435|GALT3_HUMAN	18	73419	14 (1)	2 (1)	0.04	Polypeptide N-acetylgalactosaminyltransferase 3 OS=Homo sapiens OX=9606 GN=GALNT3 PE=1 SV=2
192	sp|Q92558|WASF1_HUMAN	18	61899	1 (1)	1 (1)	0.05	Wiskott-Aldrich syndrome protein family member 1 OS=Homo sapiens OX=9606 GN=WASF1 PE=1 SV=1
193	sp|P09525|ANXA4_HUMAN	18	36088	2 (1)	2 (1)	0.09	Annexin A4 OS=Homo sapiens OX=9606 GN=ANXA4 PE=1 SV=4
194	sp|P38646|GRP75_HUMAN	18	73920	2 (1)	2 (1)	0.04	Stress-70 protein, mitochondrial OS=Homo sapiens OX=9606 GN=HSPA9 PE=1 SV=2
195	tr|E9PQD7|E9PQD7_HUMAN	18	25366	5 (1)	5 (1)	0.13	40S ribosomal protein S2 OS=Homo sapiens OX=9606 GN=RPS2 PE=1 SV=1
196	tr|E9PEB5|E9PEB5_HUMAN	17	69032	6 (1)	5 (1)	0.05	Far upstream element-binding protein 1 OS=Homo sapiens OX=9606 GN=FUBP1 PE=1 SV=1
197	tr|A0A0A0MS07|A0A0A0MS07_HUMAN	16	32476	4 (1)	4 (1)	0.1	Immunoglobulin heavy constant gamma 1 (Fragment) OS=Homo sapiens OX=9606 GN=IGHG1 PE=1 SV=1
198	tr|K7EQ02|K7EQ02_HUMAN	16	35169	2 (1)	2 (1)	0.09	DAZ-associated protein 1 (Fragment) OS=Homo sapiens OX=9606 GN=DAZAP1 PE=1 SV=2
199	sp|Q13247|SRSF6_HUMAN	15	39677	3 (1)	2 (1)	0.08	Serine/arginine-rich splicing factor 6 OS=Homo sapiens OX=9606 GN=SRSF6 PE=1 SV=2

## Sheet: Band 2
	Accession	Score	Mass	Matches	Sequences	emPAI
1	tr|A0A087WVV2|A0A087WVV2_HUMAN	195	103112	26 (8)	22 (8)	0.28	Ribosome-binding protein 1 OS=Homo sapiens OX=9606 GN=RRBP1 PE=1 SV=1
2	sp|Q14152|EIF3A_HUMAN	156	166867	26 (12)	19 (10)	0.24	Eukaryotic translation initiation factor 3 subunit A OS=Homo sapiens OX=9606 GN=EIF3A PE=1 SV=1
3	sp|P11021|BIP_HUMAN	151	72402	20 (8)	16 (8)	0.43	Endoplasmic reticulum chaperone BiP OS=Homo sapiens OX=9606 GN=HSPA5 PE=1 SV=2
4	sp|P26038|MOES_HUMAN	149	67892	25 (9)	16 (4)	0.21	Moesin OS=Homo sapiens OX=9606 GN=MSN PE=1 SV=3
5	sp|P51659|DHB4_HUMAN	130	80092	21 (6)	18 (6)	0.27	Peroxisomal multifunctional enzyme type 2 OS=Homo sapiens OX=9606 GN=HSD17B4 PE=1 SV=3
6	sp|P12111|CO6A3_HUMAN	117	345167	46 (8)	37 (7)	0.07	Collagen alpha-3(VI) chain OS=Homo sapiens OX=9606 GN=COL6A3 PE=1 SV=5
7	sp|Q14764|MVP_HUMAN	117	99551	25 (8)	17 (6)	0.21	Major vault protein OS=Homo sapiens OX=9606 GN=MVP PE=1 SV=4
8	sp|B5ME19|EIFCL_HUMAN	106	106091	15 (7)	12 (6)	0.2	Eukaryotic translation initiation factor 3 subunit C-like protein OS=Homo sapiens OX=9606 GN=EIF3CL PE=3 SV=1
9	tr|V9GYZ6|V9GYZ6_HUMAN	94	109884	27 (6)	19 (6)	0.19	Bifunctional glutamate/proline--tRNA ligase (Fragment) OS=Homo sapiens OX=9606 GN=EPRS PE=1 SV=1
10	sp|P26639|SYTC_HUMAN	90	84294	13 (4)	9 (3)	0.12	Threonine--tRNA ligase, cytoplasmic OS=Homo sapiens OX=9606 GN=TARS PE=1 SV=3
11	sp|Q02809|PLOD1_HUMAN	86	84068	12 (4)	9 (4)	0.17	Procollagen-lysine,2-oxoglutarate 5-dioxygenase 1 OS=Homo sapiens OX=9606 GN=PLOD1 PE=1 SV=2
12	tr|A0A075B6Z2|A0A075B6Z2_HUMAN	86	2220	30 (9)	1 (1)	1.81	T cell receptor alpha joining 56 (Fragment) OS=Homo sapiens OX=9606 GN=TRAJ56 PE=4 SV=1
13	sp|P21980|TGM2_HUMAN	76	78420	15 (4)	15 (4)	0.18	Protein-glutamine gamma-glutamyltransferase 2 OS=Homo sapiens OX=9606 GN=TGM2 PE=1 SV=2
14	sp|Q12797|ASPH_HUMAN	76	86266	7 (2)	6 (2)	0.08	Aspartyl/asparaginyl beta-hydroxylase OS=Homo sapiens OX=9606 GN=ASPH PE=1 SV=3
15	tr|A0A087X0S5|A0A087X0S5_HUMAN	74	109355	10 (2)	9 (2)	0.06	Collagen alpha-1(VI) chain OS=Homo sapiens OX=9606 GN=COL6A1 PE=1 SV=1
16	sp|Q12906|ILF3_HUMAN	74	95678	33 (7)	24 (6)	0.27	Interleukin enhancer-binding factor 3 OS=Homo sapiens OX=9606 GN=ILF3 PE=1 SV=3
17	sp|P40939|ECHA_HUMAN	70	83688	18 (4)	14 (3)	0.17	Trifunctional enzyme subunit alpha, mitochondrial OS=Homo sapiens OX=9606 GN=HADHA PE=1 SV=2
18	sp|P02751|FINC_HUMAN	69	266052	22 (5)	13 (5)	0.06	Fibronectin OS=Homo sapiens OX=9606 GN=FN1 PE=1 SV=4
19	sp|O75165|DJC13_HUMAN	68	256533	3 (1)	3 (1)	0.01	DnaJ homolog subfamily C member 13 OS=Homo sapiens OX=9606 GN=DNAJC13 PE=1 SV=5
20	sp|O60568|PLOD3_HUMAN	67	85302	16 (2)	12 (2)	0.08	Procollagen-lysine,2-oxoglutarate 5-dioxygenase 3 OS=Homo sapiens OX=9606 GN=PLOD3 PE=1 SV=1
21	tr|A0A087X0A8|A0A087X0A8_HUMAN	66	203953	7 (3)	6 (3)	0.05	Collagen alpha-1(XII) chain OS=Homo sapiens OX=9606 GN=COL12A1 PE=1 SV=1
22	sp|P11387|TOP1_HUMAN	64	91125	18 (4)	11 (4)	0.15	DNA topoisomerase 1 OS=Homo sapiens OX=9606 GN=TOP1 PE=1 SV=2
23	sp|P60709|ACTB_HUMAN	63	42052	6 (1)	4 (1)	0.08	Actin, cytoplasmic 1 OS=Homo sapiens OX=9606 GN=ACTB PE=1 SV=1
24	tr|A0A0B4J259|A0A0B4J259_HUMAN	60	15661	3 (2)	1 (1)	0.22	Lysozyme OS=Homo sapiens OX=9606 GN=LYZ PE=1 SV=1
25	sp|Q8TCS8|PNPT1_HUMAN	59	86524	5 (2)	3 (1)	0.04	Polyribonucleotide nucleotidyltransferase 1, mitochondrial OS=Homo sapiens OX=9606 GN=PNPT1 PE=1 SV=2
26	sp|P35579|MYH9_HUMAN	57	227646	31 (4)	24 (3)	0.04	Myosin-9 OS=Homo sapiens OX=9606 GN=MYH9 PE=1 SV=4
27	tr|F5H6E2|F5H6E2_HUMAN	56	119719	9 (2)	7 (2)	0.06	Unconventional myosin-Ic OS=Homo sapiens OX=9606 GN=MYO1C PE=1 SV=1
28	sp|Q07065|CKAP4_HUMAN	54	66097	15 (2)	13 (2)	0.1	Cytoskeleton-associated protein 4 OS=Homo sapiens OX=9606 GN=CKAP4 PE=1 SV=2
29	tr|A0A1B0GVU9|A0A1B0GVU9_HUMAN	52	84756	10 (2)	10 (2)	0.08	Glutamine--tRNA ligase (Fragment) OS=Homo sapiens OX=9606 GN=QARS PE=1 SV=1
30	sp|P12110|CO6A2_HUMAN	51	109709	5 (3)	4 (3)	0.09	Collagen alpha-2(VI) chain OS=Homo sapiens OX=9606 GN=COL6A2 PE=1 SV=4
31	tr|U3KQK0|U3KQK0_HUMAN	49	18792	7 (1)	4 (1)	0.18	Histone H2B OS=Homo sapiens OX=9606 GN=HIST1H2BN PE=1 SV=1
32	sp|Q16394|EXT1_HUMAN	46	86941	1 (1)	1 (1)	0.04	Exostosin-1 OS=Homo sapiens OX=9606 GN=EXT1 PE=1 SV=2
33	sp|P53621|COPA_HUMAN	45	139797	11 (3)	8 (3)	0.07	Coatomer subunit alpha OS=Homo sapiens OX=9606 GN=COPA PE=1 SV=2
34	tr|F8VTQ5|F8VTQ5_HUMAN	42	16640	2 (2)	2 (2)	0.45	Heterogeneous nuclear ribonucleoprotein A1 (Fragment) OS=Homo sapiens OX=9606 GN=HNRNPA1 PE=1 SV=1
35	tr|A2A376|A2A376_HUMAN	42	83815	4 (2)	4 (2)	0.08	Probable ATP-dependent RNA helicase DDX58 OS=Homo sapiens OX=9606 GN=DDX58 PE=1 SV=1
36	tr|E9PEB5|E9PEB5_HUMAN	39	69032	3 (2)	3 (2)	0.1	Far upstream element-binding protein 1 OS=Homo sapiens OX=9606 GN=FUBP1 PE=1 SV=1
37	tr|A0A1W2PQ43|A0A1W2PQ43_HUMAN	37	80627	1 (1)	1 (1)	0.04	Bcl-2-associated transcription factor 1 OS=Homo sapiens OX=9606 GN=BCLAF1 PE=1 SV=1
38	tr|H0YLE8|H0YLE8_HUMAN	37	125000	5 (1)	3 (1)	0.03	Ras GTPase-activating-like protein IQGAP1 OS=Homo sapiens OX=9606 GN=IQGAP1 PE=1 SV=1
39	sp|P62805|H4_HUMAN	35	11360	8 (3)	5 (3)	1.22	Histone H4 OS=Homo sapiens OX=9606 GN=HIST1H4A PE=1 SV=2
40	sp|Q8NBJ5|GT251_HUMAN	33	71933	10 (1)	6 (1)	0.05	Procollagen galactosyltransferase 1 OS=Homo sapiens OX=9606 GN=COLGALT1 PE=1 SV=1
41	tr|A0A087WTP3|A0A087WTP3_HUMAN	32	73438	6 (1)	4 (1)	0.04	Far upstream element-binding protein 2 OS=Homo sapiens OX=9606 GN=KHSRP PE=1 SV=1
42	tr|F5H3Y4|F5H3Y4_HUMAN	30	108432	2 (1)	2 (1)	0.03	Probable ATP-dependent RNA helicase DHX37 OS=Homo sapiens OX=9606 GN=DHX37 PE=1 SV=1
43	sp|P81605|DCD_HUMAN	29	11391	2 (1)	2 (1)	0.3	Dermcidin OS=Homo sapiens OX=9606 GN=DCD PE=1 SV=2
44	sp|P19338|NUCL_HUMAN	29	76625	5 (2)	2 (1)	0.04	Nucleolin OS=Homo sapiens OX=9606 GN=NCL PE=1 SV=3
45	sp|Q86YZ3|HORN_HUMAN	28	283140	3 (1)	3 (1)	0.01	Hornerin OS=Homo sapiens OX=9606 GN=HRNR PE=1 SV=2
46	tr|B7Z645|B7Z645_HUMAN	28	52185	3 (1)	2 (1)	0.06	Heterogeneous nuclear ribonucleoprotein Q OS=Homo sapiens OX=9606 GN=SYNCRIP PE=1 SV=1
47	tr|M0R2F5|M0R2F5_HUMAN	28	15862	1 (1)	1 (1)	0.21	Coiled-coil domain-containing protein 124 (Fragment) OS=Homo sapiens OX=9606 GN=CCDC124 PE=1 SV=8
48	sp|Q12965|MYO1E_HUMAN	26	127552	8 (1)	7 (1)	0.03	Unconventional myosin-Ie OS=Homo sapiens OX=9606 GN=MYO1E PE=1 SV=2
49	sp|Q9P2J5|SYLC_HUMAN	26	135577	12 (1)	10 (1)	0.02	Leucine--tRNA ligase, cytoplasmic OS=Homo sapiens OX=9606 GN=LARS PE=1 SV=2
50	tr|H0YNP1|H0YNP1_HUMAN	25	63018	4 (1)	4 (1)	0.05	D-glucuronyl C5-epimerase OS=Homo sapiens OX=9606 GN=GLCE PE=1 SV=1
51	sp|Q8TEQ6|GEMI5_HUMAN	24	170821	12 (1)	11 (1)	0.02	Gem-associated protein 5 OS=Homo sapiens OX=9606 GN=GEMIN5 PE=1 SV=3
52	sp|P0C0S8|H2A1_HUMAN	23	14083	3 (1)	3 (1)	0.24	Histone H2A type 1 OS=Homo sapiens OX=9606 GN=HIST1H2AG PE=1 SV=2
53	tr|A0A0A0MSX9|A0A0A0MSX9_HUMAN	22	143509	6 (1)	6 (1)	0.02	Isoleucine--tRNA ligase, cytoplasmic OS=Homo sapiens OX=9606 GN=IARS PE=1 SV=1
54	sp|Q08211|DHX9_HUMAN	22	142181	1 (1)	1 (1)	0.02	ATP-dependent RNA helicase A OS=Homo sapiens OX=9606 GN=DHX9 PE=1 SV=4
55	tr|A0A087WV01|A0A087WV01_HUMAN	21	46844	4 (1)	3 (1)	0.07	Elongation factor 1-alpha OS=Homo sapiens OX=9606 GN=EEF1A1 PE=1 SV=1
56	tr|Q5W0J8|Q5W0J8_HUMAN	19	25848	1 (1)	1 (1)	0.13	Enoyl-CoA hydratase domain-containing protein 3, mitochondrial (Fragment) OS=Homo sapiens OX=9606 GN=ECHDC3 PE=1 SV=1
57	tr|E7ETU9|E7ETU9_HUMAN	17	81746	2 (1)	1 (1)	0.04	Procollagen-lysine,2-oxoglutarate 5-dioxygenase 2 OS=Homo sapiens OX=9606 GN=PLOD2 PE=1 SV=1
58	tr|A0A1W2PNX7|A0A1W2PNX7_HUMAN	17	16398	1 (1)	1 (1)	0.21	Lysosome membrane protein 2 (Fragment) OS=Homo sapiens OX=9606 GN=SCARB2 PE=1 SV=1
59	tr|H3BVC7|H3BVC7_HUMAN	17	6947	2 (1)	2 (1)	0.51	40S ribosomal protein S15a (Fragment) OS=Homo sapiens OX=9606 GN=RPS15A PE=1 SV=1
60	sp|Q9BRZ2|TRI56_HUMAN	16	83147	1 (1)	1 (1)	0.04	E3 ubiquitin-protein ligase TRIM56 OS=Homo sapiens OX=9606 GN=TRIM56 PE=1 SV=3

## Sheet: Band 3
	Accessio	Score	Mass	Matches	Sequences	emPAI
1	sp|P54136|SYRC_HUMAN	225	76129	43 (15)	32 (14)	0.88	Arginine--tRNA ligase, cytoplasmic OS=Homo sapiens OX=9606 GN=RARS PE=1 SV=2
2	sp|P35579|MYH9_HUMAN	112	227646	37 (7)	24 (6)	0.09	Myosin-9 OS=Homo sapiens OX=9606 GN=MYH9 PE=1 SV=4
3	sp|Q7KZF4|SND1_HUMAN	83	102618	3 (2)	2 (1)	0.03	Staphylococcal nuclease domain-containing protein 1 OS=Homo sapiens OX=9606 GN=SND1 PE=1 SV=1
4	tr|E7ENL6|E7ENL6_HUMAN	81	279429	36 (6)	27 (6)	0.07	Collagen alpha-3(VI) chain OS=Homo sapiens OX=9606 GN=COL6A3 PE=1 SV=2
5	tr|U3KQK0|U3KQK0_HUMAN	78	18792	5 (2)	3 (1)	0.39	Histone H2B OS=Homo sapiens OX=9606 GN=HIST1H2BN PE=1 SV=1
6	sp|P04843|RPN1_HUMAN	73	68641	12 (5)	12 (5)	0.26	Dolichyl-diphosphooligosaccharide--protein glycosyltransferase subunit 1 OS=Homo sapiens OX=9606 GN=RPN1 PE=1 SV=1
7	sp|Q9P2J5|SYLC_HUMAN	71	135577	6 (3)	4 (2)	0.05	Leucine--tRNA ligase, cytoplasmic OS=Homo sapiens OX=9606 GN=LARS PE=1 SV=2
8	sp|P0DMV8|HS71A_HUMAN	67	70294	5 (2)	5 (2)	0.1	Heat shock 70 kDa protein 1A OS=Homo sapiens OX=9606 GN=HSPA1A PE=1 SV=1
9	tr|A0A075B6Z2|A0A075B6Z2_HUMAN	65	2220	27 (6)	1 (1)	1.81	T cell receptor alpha joining 56 (Fragment) OS=Homo sapiens OX=9606 GN=TRAJ56 PE=4 SV=1
10	sp|B5ME19|EIFCL_HUMAN	65	106091	16 (3)	13 (3)	0.1	Eukaryotic translation initiation factor 3 subunit C-like protein OS=Homo sapiens OX=9606 GN=EIF3CL PE=3 SV=1
11	sp|P62805|H4_HUMAN	58	11360	8 (3)	6 (3)	1.22	Histone H4 OS=Homo sapiens OX=9606 GN=HIST1H4A PE=1 SV=2
12	sp|P02751|FINC_HUMAN	58	266052	16 (2)	13 (2)	0.02	Fibronectin OS=Homo sapiens OX=9606 GN=FN1 PE=1 SV=4
13	sp|P22626|ROA2_HUMAN	53	37464	3 (1)	3 (1)	0.09	Heterogeneous nuclear ribonucleoproteins A2/B1 OS=Homo sapiens OX=9606 GN=HNRNPA2B1 PE=1 SV=2
14	tr|A0A087X0S5|A0A087X0S5_HUMAN	51	109355	5 (1)	5 (1)	0.03	Collagen alpha-1(VI) chain OS=Homo sapiens OX=9606 GN=COL6A1 PE=1 SV=1
15	sp|P11387|TOP1_HUMAN	50	91125	9 (3)	6 (3)	0.11	DNA topoisomerase 1 OS=Homo sapiens OX=9606 GN=TOP1 PE=1 SV=2
16	tr|J3KRZ1|J3KRZ1_HUMAN	49	19293	1 (1)	1 (1)	0.17	Probable ATP-dependent RNA helicase DDX5 (Fragment) OS=Homo sapiens OX=9606 GN=DDX5 PE=1 SV=1
17	sp|P46063|RECQ1_HUMAN	48	74436	9 (3)	6 (3)	0.14	ATP-dependent DNA helicase Q1 OS=Homo sapiens OX=9606 GN=RECQL PE=1 SV=3
18	sp|O94973|AP2A2_HUMAN	44	104807	2 (2)	2 (2)	0.06	AP-2 complex subunit alpha-2 OS=Homo sapiens OX=9606 GN=AP2A2 PE=1 SV=2
19	sp|P40222|TXLNA_HUMAN	45	62195	1 (1)	1 (1)	0.05	Alpha-taxilin OS=Homo sapiens OX=9606 GN=TXLNA PE=1 SV=3
20	sp|P04406|G3P_HUMAN	45	36201	4 (1)	3 (1)	0.09	Glyceraldehyde-3-phosphate dehydrogenase OS=Homo sapiens OX=9606 GN=GAPDH PE=1 SV=3
21	sp|P51659|DHB4_HUMAN	42	80092	8 (2)	6 (2)	0.08	Peroxisomal multifunctional enzyme type 2 OS=Homo sapiens OX=9606 GN=HSD17B4 PE=1 SV=3
22	sp|P53621|COPA_HUMAN	42	139797	3 (3)	2 (2)	0.05	Coatomer subunit alpha OS=Homo sapiens OX=9606 GN=COPA PE=1 SV=2
23	sp|Q14764|MVP_HUMAN	42	99551	17 (2)	15 (2)	0.07	Major vault protein OS=Homo sapiens OX=9606 GN=MVP PE=1 SV=4
24	sp|P06748|NPM_HUMAN	41	32726	2 (1)	1 (1)	0.1	Nucleophosmin OS=Homo sapiens OX=9606 GN=NPM1 PE=1 SV=2
25	tr|H0YNP1|H0YNP1_HUMAN	39	63018	3 (1)	3 (1)	0.05	D-glucuronyl C5-epimerase OS=Homo sapiens OX=9606 GN=GLCE PE=1 SV=1
26	tr|V9GYZ6|V9GYZ6_HUMAN	39	109884	7 (2)	6 (2)	0.06	Bifunctional glutamate/proline--tRNA ligase (Fragment) OS=Homo sapiens OX=9606 GN=EPRS PE=1 SV=1
27	tr|B1AHC9|B1AHC9_HUMAN	39	64528	8 (1)	8 (1)	0.05	X-ray repair cross-complementing protein 6 OS=Homo sapiens OX=9606 GN=XRCC6 PE=1 SV=1
28	sp|Q12797|ASPH_HUMAN	38	86266	4 (1)	3 (1)	0.04	Aspartyl/asparaginyl beta-hydroxylase OS=Homo sapiens OX=9606 GN=ASPH PE=1 SV=3
29	tr|A0A1W2PQ43|A0A1W2PQ43_HUMAN	37	80627	1 (1)	1 (1)	0.04	Bcl-2-associated transcription factor 1 OS=Homo sapiens OX=9606 GN=BCLAF1 PE=1 SV=1
30	sp|P02768|ALBU_HUMAN	35	71317	12 (1)	8 (1)	0.05	Serum albumin OS=Homo sapiens OX=9606 GN=ALB PE=1 SV=2
31	sp|Q8N1G4|LRC47_HUMAN	34	64004	6 (2)	5 (2)	0.11	Leucine-rich repeat-containing protein 47 OS=Homo sapiens OX=9606 GN=LRRC47 PE=1 SV=1
32	tr|B7Z645|B7Z645_HUMAN	34	52185	2 (1)	2 (1)	0.06	Heterogeneous nuclear ribonucleoprotein Q OS=Homo sapiens OX=9606 GN=SYNCRIP PE=1 SV=1
33	sp|P81605|DCD_HUMAN	33	11391	2 (1)	2 (1)	0.3	Dermcidin OS=Homo sapiens OX=9606 GN=DCD PE=1 SV=2
34	sp|Q07065|CKAP4_HUMAN	33	66097	13 (1)	10 (1)	0.05	Cytoskeleton-associated protein 4 OS=Homo sapiens OX=9606 GN=CKAP4 PE=1 SV=2
35	sp|P02452|CO1A1_HUMAN	32	139883	6 (2)	6 (2)	0.05	Collagen alpha-1(I) chain OS=Homo sapiens OX=9606 GN=COL1A1 PE=1 SV=5
36	sp|P61604|CH10_HUMAN	32	10925	2 (1)	2 (1)	0.32	10 kDa heat shock protein, mitochondrial OS=Homo sapiens OX=9606 GN=HSPE1 PE=1 SV=2
37	tr|A0A087WVV2|A0A087WVV2_HUMAN	31	103112	10 (2)	8 (1)	0.03	Ribosome-binding protein 1 OS=Homo sapiens OX=9606 GN=RRBP1 PE=1 SV=1
38	tr|A0A0J9YWE8|A0A0J9YWE8_HUMAN	31	17627	1 (1)	1 (1)	0.19	14-3-3 protein beta/alpha OS=Homo sapiens OX=9606 GN=YWHAB PE=1 SV=1
39	tr|H0YLE8|H0YLE8_HUMAN	30	125000	4 (1)	3 (1)	0.03	Ras GTPase-activating-like protein IQGAP1 OS=Homo sapiens OX=9606 GN=IQGAP1 PE=1 SV=1
40	sp|Q15046|SYK_HUMAN	30	68461	13 (1)	13 (1)	0.05	Lysine--tRNA ligase OS=Homo sapiens OX=9606 GN=KARS PE=1 SV=3
41	sp|Q9Y3Z3|SAMH1_HUMAN	30	72896	7 (2)	4 (1)	0.05	Deoxynucleoside triphosphate triphosphohydrolase SAMHD1 OS=Homo sapiens OX=9606 GN=SAMHD1 PE=1 SV=2
42	sp|P0C0S5|H2AZ_HUMAN	30	13545	2 (1)	2 (1)	0.25	Histone H2A.Z OS=Homo sapiens OX=9606 GN=H2AFZ PE=1 SV=2
43	sp|Q96AE4|FUBP1_HUMAN	28	67690	5 (2)	5 (2)	0.1	Far upstream element-binding protein 1 OS=Homo sapiens OX=9606 GN=FUBP1 PE=1 SV=3
44	sp|P19338|NUCL_HUMAN	29	76625	6 (1)	5 (1)	0.04	Nucleolin OS=Homo sapiens OX=9606 GN=NCL PE=1 SV=3
45	sp|P14174|MIF_HUMAN	28	12639	1 (1)	1 (1)	0.27	Macrophage migration inhibitory factor OS=Homo sapiens OX=9606 GN=MIF PE=1 SV=4
46	sp|P11142|HSP7C_HUMAN	28	71082	18 (3)	15 (3)	0.15	Heat shock cognate 71 kDa protein OS=Homo sapiens OX=9606 GN=HSPA8 PE=1 SV=1
47	tr|A0A087WTP3|A0A087WTP3_HUMAN	28	73438	6 (1)	4 (1)	0.04	Far upstream element-binding protein 2 OS=Homo sapiens OX=9606 GN=KHSRP PE=1 SV=1
48	sp|P68363|TBA1B_HUMAN	28	50804	4 (1)	4 (1)	0.06	Tubulin alpha-1B chain OS=Homo sapiens OX=9606 GN=TUBA1B PE=1 SV=1
49	tr|F8VTQ5|F8VTQ5_HUMAN	27	16640	2 (1)	2 (1)	0.2	Heterogeneous nuclear ribonucleoprotein A1 (Fragment) OS=Homo sapiens OX=9606 GN=HNRNPA1 PE=1 SV=1
50	sp|P12110|CO6A2_HUMAN	27	109709	5 (2)	5 (2)	0.06	Collagen alpha-2(VI) chain OS=Homo sapiens OX=9606 GN=COL6A2 PE=1 SV=4
51	sp|P57772|SELB_HUMAN	23	65890	7 (1)	6 (1)	0.05	Selenocysteine-specific elongation factor OS=Homo sapiens OX=9606 GN=EEFSEC PE=1 SV=4
52	tr|D6REB5|D6REB5_HUMAN	22	58118	2 (1)	1 (1)	0.06	Alpha-L-iduronidase OS=Homo sapiens OX=9606 GN=IDUA PE=1 SV=1
53	tr|C9IZL7|C9IZL7_HUMAN	22	23715	2 (1)	1 (1)	0.14	Non-POU domain-containing octamer-binding protein (Fragment) OS=Homo sapiens OX=9606 GN=NONO PE=1 SV=1
54	sp|O75165|DJC13_HUMAN	21	256533	3 (1)	2 (1)	0.01	DnaJ homolog subfamily C member 13 OS=Homo sapiens OX=9606 GN=DNAJC13 PE=1 SV=5
55	sp|Q8NBJ5|GT251_HUMAN	18	71933	9 (1)	8 (1)	0.05	Procollagen galactosyltransferase 1 OS=Homo sapiens OX=9606 GN=COLGALT1 PE=1 SV=1
56	sp|P21980|TGM2_HUMAN	17	78420	7 (1)	6 (1)	0.04	Protein-glutamine gamma-glutamyltransferase 2 OS=Homo sapiens OX=9606 GN=TGM2 PE=1 SV=2
57	sp|Q03989|ARI5A_HUMAN	16	64718	6 (1)	2 (1)	0.05	AT-rich interactive domain-containing protein 5A OS=Homo sapiens OX=9606 GN=ARID5A PE=1 SV=2
58	tr|A0A0A0MS51|A0A0A0MS51_HUMAN	16	82759	8 (1)	6 (1)	0.04	Gelsolin OS=Homo sapiens OX=9606 GN=GSN PE=1 SV=1

## Sheet: Band 4
	Accession	Score	Mass	Matches	Sequences	emPAI
1	sp|P14923|PLAK_HUMAN	266	82434	28 (10)	20 (10)	0.48	Junction plakoglobin OS=Homo sapiens OX=9606 GN=JUP PE=1 SV=3
2	tr|Q3BDU5|Q3BDU5_HUMAN	223	55605	21 (9)	17 (8)	0.58	Prelamin-A/C OS=Homo sapiens OX=9606 GN=LMNA PE=1 SV=1
3	sp|P51659|DHB4_HUMAN	222	80092	18 (7)	16 (7)	0.32	Peroxisomal multifunctional enzyme type 2 OS=Homo sapiens OX=9606 GN=HSD17B4 PE=1 SV=3
4	sp|Q13885|TBB2A_HUMAN	213	50274	25 (11)	14 (9)	0.89	Tubulin beta-2A chain OS=Homo sapiens OX=9606 GN=TUBB2A PE=1 SV=1
5	tr|A0A087WTA8|A0A087WTA8_HUMAN	179	129586	15 (7)	8 (4)	0.16	Collagen alpha-2(I) chain OS=Homo sapiens OX=9606 GN=COL1A2 PE=1 SV=1
6	sp|Q13011|ECH1_HUMAN	179	36136	12 (4)	9 (3)	0.42	Delta(3,5)-Delta(2,4)-dienoyl-CoA isomerase, mitochondrial OS=Homo sapiens OX=9606 GN=ECH1 PE=1 SV=2
7	sp|P68363|TBA1B_HUMAN	174	50804	19 (9)	13 (6)	0.55	Tubulin alpha-1B chain OS=Homo sapiens OX=9606 GN=TUBA1B PE=1 SV=1
8	sp|P15924|DESP_HUMAN	166	334021	42 (13)	39 (11)	0.11	Desmoplakin OS=Homo sapiens OX=9606 GN=DSP PE=1 SV=3
9	sp|P12277|KCRB_HUMAN	162	42902	11 (7)	7 (5)	0.56	Creatine kinase B-type OS=Homo sapiens OX=9606 GN=CKB PE=1 SV=1
10	sp|Q13835|PKP1_HUMAN	148	84119	12 (7)	10 (5)	0.21	Plakophilin-1 OS=Homo sapiens OX=9606 GN=PKP1 PE=1 SV=2
11	sp|P67936|TPM4_HUMAN	143	28619	28 (8)	21 (7)	1.16	Tropomyosin alpha-4 chain OS=Homo sapiens OX=9606 GN=TPM4 PE=1 SV=3
12	sp|Q15717|ELAV1_HUMAN	139	36240	6 (5)	4 (3)	0.3	ELAV-like protein 1 OS=Homo sapiens OX=9606 GN=ELAVL1 PE=1 SV=2
13	sp|Q15113|PCOC1_HUMAN	121	48797	5 (4)	4 (3)	0.22	Procollagen C-endopeptidase enhancer 1 OS=Homo sapiens OX=9606 GN=PCOLCE PE=1 SV=2
14	sp|P62805|H4_HUMAN	115	11360	15 (5)	7 (4)	2.77	Histone H4 OS=Homo sapiens OX=9606 GN=HIST1H4A PE=1 SV=2
15	tr|J3KPX7|J3KPX7_HUMAN	111	33219	10 (4)	8 (4)	0.46	Prohibitin-2 OS=Homo sapiens OX=9606 GN=PHB2 PE=1 SV=2
16	sp|P62258|1433E_HUMAN	108	29326	9 (4)	6 (3)	0.38	14-3-3 protein epsilon OS=Homo sapiens OX=9606 GN=YWHAE PE=1 SV=1
17	sp|Q5VTE0|EF1A3_HUMAN	102	50495	14 (6)	11 (6)	0.46	Putative elongation factor 1-alpha-like 3 OS=Homo sapiens OX=9606 GN=EEF1A1P5 PE=5 SV=1
18	sp|Q6NZI2|CAVN1_HUMAN	101	43450	7 (3)	4 (2)	0.16	Caveolae-associated protein 1 OS=Homo sapiens OX=9606 GN=CAVIN1 PE=1 SV=1
19	sp|Q01085|TIAR_HUMAN	101	41906	7 (4)	5 (4)	0.35	Nucleolysin TIAR OS=Homo sapiens OX=9606 GN=TIAL1 PE=1 SV=1
20	tr|A0A087WU53|A0A087WU53_HUMAN	98	41961	12 (7)	7 (5)	0.46	Magnesium transporter protein 1 OS=Homo sapiens OX=9606 GN=MAGT1 PE=1 SV=1
21	sp|P02768|ALBU_HUMAN	98	71317	23 (10)	20 (10)	0.57	Serum albumin OS=Homo sapiens OX=9606 GN=ALB PE=1 SV=2
22	sp|P46777|RL5_HUMAN	93	34569	14 (4)	10 (4)	0.44	60S ribosomal protein L5 OS=Homo sapiens OX=9606 GN=RPL5 PE=1 SV=3
23	sp|P07355|ANXA2_HUMAN	91	38808	13 (3)	12 (3)	0.28	Annexin A2 OS=Homo sapiens OX=9606 GN=ANXA2 PE=1 SV=2
24	sp|P60842|IF4A1_HUMAN	90	46353	7 (2)	7 (2)	0.15	Eukaryotic initiation factor 4A-I OS=Homo sapiens OX=9606 GN=EIF4A1 PE=1 SV=1
25	sp|Q8TF66|LRC15_HUMAN	90	65238	9 (4)	7 (4)	0.22	Leucine-rich repeat-containing protein 15 OS=Homo sapiens OX=9606 GN=LRRC15 PE=2 SV=2
26	sp|P11021|BIP_HUMAN	88	72402	12 (5)	11 (5)	0.25	Endoplasmic reticulum chaperone BiP OS=Homo sapiens OX=9606 GN=HSPA5 PE=1 SV=2
27	sp|P08238|HS90B_HUMAN	85	83554	11 (4)	10 (4)	0.17	Heat shock protein HSP 90-beta OS=Homo sapiens OX=9606 GN=HSP90AB1 PE=1 SV=4
28	sp|Q96HS1|PGAM5_HUMAN	85	32213	13 (3)	10 (3)	0.34	Serine/threonine-protein phosphatase PGAM5, mitochondrial OS=Homo sapiens OX=9606 GN=PGAM5 PE=1 SV=2
29	sp|P60709|ACTB_HUMAN	84	42052	24 (4)	15 (4)	0.35	Actin, cytoplasmic 1 OS=Homo sapiens OX=9606 GN=ACTB PE=1 SV=1
30	sp|P51991|ROA3_HUMAN	83	39799	5 (4)	1 (1)	0.17	Heterogeneous nuclear ribonucleoprotein A3 OS=Homo sapiens OX=9606 GN=HNRNPA3 PE=1 SV=2
31	sp|P06576|ATPB_HUMAN	81	56525	15 (5)	10 (5)	0.33	ATP synthase subunit beta, mitochondrial OS=Homo sapiens OX=9606 GN=ATP5F1B PE=1 SV=3
32	tr|A0A075B6Z2|A0A075B6Z2_HUMAN	80	2220	18 (12)	1 (1)	1.81	T cell receptor alpha joining 56 (Fragment) OS=Homo sapiens OX=9606 GN=TRAJ56 PE=4 SV=1
33	sp|P24534|EF1B_HUMAN	74	24919	5 (1)	3 (1)	0.13	Elongation factor 1-beta OS=Homo sapiens OX=9606 GN=EEF1B2 PE=1 SV=3
34	sp|P16402|H13_HUMAN	73	22336	7 (2)	5 (2)	0.32	Histone H1.3 OS=Homo sapiens OX=9606 GN=HIST1H1D PE=1 SV=2
35	tr|A0A087WUK2|A0A087WUK2_HUMAN	73	40187	8 (4)	6 (4)	0.37	Heterogeneous nuclear ribonucleoprotein D-like OS=Homo sapiens OX=9606 GN=HNRNPDL PE=1 SV=1
36	sp|P21796|VDAC1_HUMAN	72	30868	8 (5)	6 (4)	0.51	Voltage-dependent anion-selective channel protein 1 OS=Homo sapiens OX=9606 GN=VDAC1 PE=1 SV=2
37	sp|P05387|RLA2_HUMAN	71	11658	2 (1)	2 (1)	0.3	60S acidic ribosomal protein P2 OS=Homo sapiens OX=9606 GN=RPLP2 PE=1 SV=1
38	tr|H0Y449|H0Y449_HUMAN	69	42333	5 (2)	2 (1)	0.08	Nuclease-sensitive element-binding protein 1 (Fragment) OS=Homo sapiens OX=9606 GN=YBX1 PE=1 SV=1
39	tr|A0A087X0S5|A0A087X0S5_HUMAN	65	109355	10 (4)	7 (3)	0.09	Collagen alpha-1(VI) chain OS=Homo sapiens OX=9606 GN=COL6A1 PE=1 SV=1
40	tr|U3KQK0|U3KQK0_HUMAN	65	18792	6 (1)	6 (1)	0.18	Histone H2B OS=Homo sapiens OX=9606 GN=HIST1H2BN PE=1 SV=1
41	tr|A0A0C4DGA2|A0A0C4DGA2_HUMAN	64	40500	1 (1)	1 (1)	0.08	Enoyl-CoA delta isomerase 2, mitochondrial OS=Homo sapiens OX=9606 GN=ECI2 PE=1 SV=1
42	sp|P62937|PPIA_HUMAN	63	18229	5 (1)	4 (1)	0.19	Peptidyl-prolyl cis-trans isomerase A OS=Homo sapiens OX=9606 GN=PPIA PE=1 SV=2
43	sp|B5ME19|EIFCL_HUMAN	59	106091	7 (2)	6 (2)	0.06	Eukaryotic translation initiation factor 3 subunit C-like protein OS=Homo sapiens OX=9606 GN=EIF3CL PE=3 SV=1
44	tr|H0YB39|H0YB39_HUMAN	59	30590	5 (4)	2 (2)	0.23	Heterogeneous nuclear ribonucleoprotein H (Fragment) OS=Homo sapiens OX=9606 GN=HNRNPH1 PE=1 SV=1
45	tr|E9PKU4|E9PKU4_HUMAN	59	25806	3 (2)	2 (1)	0.13	60S ribosomal protein L8 (Fragment) OS=Homo sapiens OX=9606 GN=RPL8 PE=1 SV=1
46	sp|P09382|LEG1_HUMAN	58	15048	2 (1)	1 (1)	0.23	Galectin-1 OS=Homo sapiens OX=9606 GN=LGALS1 PE=1 SV=2
47	sp|Q9Y446|PKP3_HUMAN	58	87485	6 (1)	6 (1)	0.04	Plakophilin-3 OS=Homo sapiens OX=9606 GN=PKP3 PE=1 SV=1
48	sp|P04406|G3P_HUMAN	58	36201	7 (2)	7 (2)	0.19	Glyceraldehyde-3-phosphate dehydrogenase OS=Homo sapiens OX=9606 GN=GAPDH PE=1 SV=3
49	sp|P62701|RS4X_HUMAN	58	29807	3 (1)	2 (1)	0.11	40S ribosomal protein S4, X isoform OS=Homo sapiens OX=9606 GN=RPS4X PE=1 SV=2
50	tr|A0A0C4DG17|A0A0C4DG17_HUMAN	57	33464	4 (2)	4 (2)	0.21	40S ribosomal protein SA OS=Homo sapiens OX=9606 GN=RPSA PE=1 SV=1
51	tr|A0A0A0MS51|A0A0A0MS51_HUMAN	57	82759	2 (1)	2 (1)	0.04	Gelsolin OS=Homo sapiens OX=9606 GN=GSN PE=1 SV=1
52	tr|E7EPB3|E7EPB3_HUMAN	57	14663	2 (2)	2 (2)	0.52	60S ribosomal protein L14 OS=Homo sapiens OX=9606 GN=RPL14 PE=1 SV=1
53	sp|P36952|SPB5_HUMAN	57	42530	4 (2)	4 (2)	0.16	Serpin B5 OS=Homo sapiens OX=9606 GN=SERPINB5 PE=1 SV=2
54	sp|P25705|ATPA_HUMAN	53	59828	16 (4)	12 (4)	0.24	ATP synthase subunit alpha, mitochondrial OS=Homo sapiens OX=9606 GN=ATP5F1A PE=1 SV=1
55	sp|P49674|KC1E_HUMAN	55	47570	4 (1)	4 (1)	0.07	Casein kinase I isoform epsilon OS=Homo sapiens OX=9606 GN=CSNK1E PE=1 SV=1
56	tr|A0A087WTP3|A0A087WTP3_HUMAN	53	73438	2 (1)	2 (1)	0.04	Far upstream element-binding protein 2 OS=Homo sapiens OX=9606 GN=KHSRP PE=1 SV=1
57	tr|B4DY09|B4DY09_HUMAN	53	39057	6 (3)	5 (3)	0.28	Interleukin enhancer-binding factor 2 OS=Homo sapiens OX=9606 GN=ILF2 PE=1 SV=1
58	sp|Q16270|IBP7_HUMAN	52	30138	1 (1)	1 (1)	0.11	Insulin-like growth factor-binding protein 7 OS=Homo sapiens OX=9606 GN=IGFBP7 PE=1 SV=1
59	tr|A0A087WTT1|A0A087WTT1_HUMAN	52	58727	10 (4)	8 (3)	0.18	Polyadenylate-binding protein OS=Homo sapiens OX=9606 GN=PABPC1 PE=1 SV=1
60	tr|A0A024R6I7|A0A024R6I7_HUMAN	51	46850	3 (1)	2 (1)	0.07	Alpha-1-antitrypsin OS=Homo sapiens OX=9606 GN=SERPINA1 PE=1 SV=1
61	tr|H3BN98|H3BN98_HUMAN	51	27378	3 (2)	2 (1)	0.12	Uncharacterized protein (Fragment) OS=Homo sapiens OX=9606 PE=4 SV=2
62	sp|Q8NCA5|FA98A_HUMAN	50	55823	4 (1)	4 (1)	0.06	Protein FAM98A OS=Homo sapiens OX=9606 GN=FAM98A PE=1 SV=1
63	sp|P05388|RLA0_HUMAN	49	34423	4 (2)	3 (2)	0.2	60S acidic ribosomal protein P0 OS=Homo sapiens OX=9606 GN=RPLP0 PE=1 SV=1
64	tr|H0Y9Q1|H0Y9Q1_HUMAN	49	22540	4 (2)	2 (2)	0.32	Cytosol aminopeptidase (Fragment) OS=Homo sapiens OX=9606 GN=LAP3 PE=1 SV=8
65	sp|P22626|ROA2_HUMAN	49	37464	8 (3)	7 (3)	0.29	Heterogeneous nuclear ribonucleoproteins A2/B1 OS=Homo sapiens OX=9606 GN=HNRNPA2B1 PE=1 SV=2
66	sp|P61247|RS3A_HUMAN	48	30154	11 (2)	10 (2)	0.23	40S ribosomal protein S3a OS=Homo sapiens OX=9606 GN=RPS3A PE=1 SV=2
67	sp|Q09666|AHNK_HUMAN	48	629213	13 (4)	10 (2)	0.01	Neuroblast differentiation-associated protein AHNAK OS=Homo sapiens OX=9606 GN=AHNAK PE=1 SV=2
68	tr|Q5VVC8|Q5VVC8_HUMAN	47	20167	2 (1)	2 (1)	0.17	60S ribosomal protein L11 (Fragment) OS=Homo sapiens OX=9606 GN=RPL11 PE=1 SV=1
69	sp|Q86SJ6|DSG4_HUMAN	47	115462	7 (3)	5 (2)	0.06	Desmoglein-4 OS=Homo sapiens OX=9606 GN=DSG4 PE=1 SV=1
70	tr|A0A0B4J259|A0A0B4J259_HUMAN	47	15661	2 (1)	2 (1)	0.22	Lysozyme OS=Homo sapiens OX=9606 GN=LYZ PE=1 SV=1
71	tr|A0A087WSW9|A0A087WSW9_HUMAN	46	60782	1 (1)	1 (1)	0.05	Thioredoxin reductase 1, cytoplasmic OS=Homo sapiens OX=9606 GN=TXNRD1 PE=1 SV=1
72	sp|P13639|EF2_HUMAN	46	96246	10 (2)	9 (2)	0.07	Elongation factor 2 OS=Homo sapiens OX=9606 GN=EEF2 PE=1 SV=4
73	sp|O75569|PRKRA_HUMAN	46	34839	11 (4)	9 (4)	0.44	Interferon-inducible double-stranded RNA-dependent protein kinase activator A OS=Homo sapiens OX=9606 GN=PRKRA PE=1 SV=1
74	sp|Q08188|TGM3_HUMAN	45	76926	2 (1)	2 (1)	0.04	Protein-glutamine gamma-glutamyltransferase E OS=Homo sapiens OX=9606 GN=TGM3 PE=1 SV=4
75	tr|A0A0G2JMB2|A0A0G2JMB2_HUMAN	45	37283	1 (1)	1 (1)	0.09	Immunoglobulin heavy constant alpha 2 (Fragment) OS=Homo sapiens OX=9606 GN=IGHA2 PE=1 SV=1
76	tr|H0YCJ7|H0YCJ7_HUMAN	45	15108	4 (2)	4 (2)	0.5	40S ribosomal protein S3 (Fragment) OS=Homo sapiens OX=9606 GN=RPS3 PE=1 SV=1
77	tr|K7ELC7|K7ELC7_HUMAN	44	16460	1 (1)	1 (1)	0.21	60S ribosomal protein L27 (Fragment) OS=Homo sapiens OX=9606 GN=RPL27 PE=1 SV=1
78	sp|P01023|A2MG_HUMAN	43	164613	1 (1)	1 (1)	0.02	Alpha-2-macroglobulin OS=Homo sapiens OX=9606 GN=A2M PE=1 SV=3
79	sp|P23246|SFPQ_HUMAN	43	76216	6 (2)	5 (2)	0.09	Splicing factor, proline- and glutamine-rich OS=Homo sapiens OX=9606 GN=SFPQ PE=1 SV=2
80	sp|P36542|ATPG_HUMAN	43	33032	9 (3)	6 (3)	0.33	ATP synthase subunit gamma, mitochondrial OS=Homo sapiens OX=9606 GN=ATP5F1C PE=1 SV=1
81	sp|P48729|KC1A_HUMAN	43	39118	6 (1)	5 (1)	0.08	Casein kinase I isoform alpha OS=Homo sapiens OX=9606 GN=CSNK1A1 PE=1 SV=2
82	tr|K7ELC4|K7ELC4_HUMAN	42	9093	3 (1)	3 (1)	0.38	60S ribosomal protein L22 (Fragment) OS=Homo sapiens OX=9606 GN=RPL22 PE=1 SV=1
83	tr|A0A087X0X3|A0A087X0X3_HUMAN	42	77746	3 (1)	3 (1)	0.04	Heterogeneous nuclear ribonucleoprotein M OS=Homo sapiens OX=9606 GN=HNRNPM PE=1 SV=1
84	sp|Q9UNP9|PPIE_HUMAN	42	33695	1 (1)	1 (1)	0.1	Peptidyl-prolyl cis-trans isomerase E OS=Homo sapiens OX=9606 GN=PPIE PE=1 SV=1
85	tr|E9PRY8|E9PRY8_HUMAN	41	77150	5 (1)	5 (1)	0.04	Elongation factor 1-delta OS=Homo sapiens OX=9606 GN=EEF1D PE=1 SV=1
86	sp|P60174|TPIS_HUMAN	41	31057	2 (1)	2 (1)	0.11	Triosephosphate isomerase OS=Homo sapiens OX=9606 GN=TPI1 PE=1 SV=3
87	sp|P0C0S5|H2AZ_HUMAN	40	13545	5 (2)	4 (2)	0.57	Histone H2A.Z OS=Homo sapiens OX=9606 GN=H2AFZ PE=1 SV=2
88	sp|P16401|H15_HUMAN	40	22566	4 (1)	3 (1)	0.15	Histone H1.5 OS=Homo sapiens OX=9606 GN=HIST1H1B PE=1 SV=3
89	sp|P62269|RS18_HUMAN	40	17708	2 (2)	2 (2)	0.42	40S ribosomal protein S18 OS=Homo sapiens OX=9606 GN=RPS18 PE=1 SV=3
90	sp|P62851|RS25_HUMAN	40	13791	2 (2)	1 (1)	0.25	40S ribosomal protein S25 OS=Homo sapiens OX=9606 GN=RPS25 PE=1 SV=1
91	sp|P05109|S10A8_HUMAN	40	10885	3 (1)	2 (1)	0.32	Protein S100-A8 OS=Homo sapiens OX=9606 GN=S100A8 PE=1 SV=1
92	tr|A0A024R4M0|A0A024R4M0_HUMAN	40	22635	2 (1)	2 (1)	0.15	40S ribosomal protein S9 OS=Homo sapiens OX=9606 GN=RPS9 PE=1 SV=1
93	sp|P12110|CO6A2_HUMAN	39	109709	4 (2)	2 (2)	0.06	Collagen alpha-2(VI) chain OS=Homo sapiens OX=9606 GN=COL6A2 PE=1 SV=4
94	tr|J3KP15|J3KP15_HUMAN	39	15362	1 (1)	1 (1)	0.22	Serine/arginine-rich-splicing factor 2 (Fragment) OS=Homo sapiens OX=9606 GN=SRSF2 PE=1 SV=8
95	tr|M0QXB4|M0QXB4_HUMAN	39	37072	5 (1)	5 (1)	0.09	Coatomer protein complex, subunit epsilon, isoform CRA_g OS=Homo sapiens OX=9606 GN=COPE PE=1 SV=1
96	sp|P02452|CO1A1_HUMAN	39	139883	9 (1)	6 (1)	0.02	Collagen alpha-1(I) chain OS=Homo sapiens OX=9606 GN=COL1A1 PE=1 SV=5
97	sp|Q15365|PCBP1_HUMAN	38	37987	5 (1)	5 (1)	0.09	Poly(rC)-binding protein 1 OS=Homo sapiens OX=9606 GN=PCBP1 PE=1 SV=2
98	sp|Q13155|AIMP2_HUMAN	37	35668	10 (2)	8 (2)	0.19	Aminoacyl tRNA synthase complex-interacting multifunctional protein 2 OS=Homo sapiens OX=9606 GN=AIMP2 PE=1 SV=2
99	tr|X6RJP6|X6RJP6_HUMAN	37	21244	2 (1)	2 (1)	0.16	Transgelin-2 (Fragment) OS=Homo sapiens OX=9606 GN=TAGLN2 PE=1 SV=1
100	sp|P62854|RS26_HUMAN	37	13292	2 (1)	2 (1)	0.26	40S ribosomal protein S26 OS=Homo sapiens OX=9606 GN=RPS26 PE=1 SV=3
101	tr|Q5T8U3|Q5T8U3_HUMAN	37	21702	4 (1)	3 (1)	0.15	60S ribosomal protein L7a (Fragment) OS=Homo sapiens OX=9606 GN=RPL7A PE=1 SV=1
102	sp|P23526|SAHH_HUMAN	36	48255	4 (1)	4 (1)	0.07	Adenosylhomocysteinase OS=Homo sapiens OX=9606 GN=AHCY PE=1 SV=4
103	tr|B4DEB1|B4DEB1_HUMAN	36	14158	11 (4)	5 (2)	0.54	Histone H3 OS=Homo sapiens OX=9606 GN=H3F3A PE=1 SV=1
104	sp|P63244|RACK1_HUMAN	35	35511	7 (2)	6 (2)	0.2	Receptor of activated protein C kinase 1 OS=Homo sapiens OX=9606 GN=RACK1 PE=1 SV=3
105	tr|J3KPD9|J3KPD9_HUMAN	35	22522	1 (1)	1 (1)	0.15	NME1-NME2 readthrough OS=Homo sapiens OX=9606 GN=NME1-NME2 PE=1 SV=1
106	sp|P0DPA2|VSIG8_HUMAN	35	44946	4 (2)	2 (2)	0.15	V-set and immunoglobulin domain-containing protein 8 OS=Homo sapiens OX=9606 GN=VSIG8 PE=2 SV=1
107	sp|P00338|LDHA_HUMAN	35	36950	6 (1)	6 (1)	0.09	L-lactate dehydrogenase A chain OS=Homo sapiens OX=9606 GN=LDHA PE=1 SV=2
108	sp|P81605|DCD_HUMAN	35	11391	3 (1)	3 (1)	0.3	Dermcidin OS=Homo sapiens OX=9606 GN=DCD PE=1 SV=2
109	sp|P11177|ODPB_HUMAN	35	39550	2 (1)	2 (1)	0.08	Pyruvate dehydrogenase E1 component subunit beta, mitochondrial OS=Homo sapiens OX=9606 GN=PDHB PE=1 SV=3
110	tr|F8WE04|F8WE04_HUMAN	34	20565	1 (1)	1 (1)	0.16	Heat shock protein beta-1 OS=Homo sapiens OX=9606 GN=HSPB1 PE=1 SV=1
111	sp|P12273|PIP_HUMAN	34	16847	1 (1)	1 (1)	0.2	Prolactin-inducible protein OS=Homo sapiens OX=9606 GN=PIP PE=1 SV=1
112	sp|Q99598|TSNAX_HUMAN	34	33206	6 (2)	5 (2)	0.21	Translin-associated protein X OS=Homo sapiens OX=9606 GN=TSNAX PE=1 SV=1
113	sp|P15927|RFA2_HUMAN	34	29342	3 (1)	3 (1)	0.11	Replication protein A 32 kDa subunit OS=Homo sapiens OX=9606 GN=RPA2 PE=1 SV=1
114	sp|P02751|FINC_HUMAN	34	266052	8 (1)	7 (1)	0.01	Fibronectin OS=Homo sapiens OX=9606 GN=FN1 PE=1 SV=4
115	tr|H0YHG0|H0YHG0_HUMAN	33	59605	1 (1)	1 (1)	0.06	Uncharacterized protein (Fragment) OS=Homo sapiens OX=9606 PE=1 SV=1
116	sp|Q9UHB9|SRP68_HUMAN	33	71199	1 (1)	1 (1)	0.05	Signal recognition particle subunit SRP68 OS=Homo sapiens OX=9606 GN=SRP68 PE=1 SV=2
117	sp|O75367|H2AY_HUMAN	33	39764	5 (1)	3 (1)	0.08	Core histone macro-H2A.1 OS=Homo sapiens OX=9606 GN=H2AFY PE=1 SV=4
118	tr|A8MUD9|A8MUD9_HUMAN	33	24474	3 (1)	3 (1)	0.14	60S ribosomal protein L7 OS=Homo sapiens OX=9606 GN=RPL7 PE=1 SV=1
119	tr|G3XAN4|G3XAN4_HUMAN	33	33528	2 (1)	2 (1)	0.1	Translocating chain-associated membrane protein 1 OS=Homo sapiens OX=9606 GN=TRAM1 PE=1 SV=1
120	sp|E9PAV3|NACAM_HUMAN	33	205979	2 (1)	2 (1)	0.02	Nascent polypeptide-associated complex subunit alpha, muscle-specific form OS=Homo sapiens OX=9606 GN=NACA PE=1 SV=1
121	tr|A0A087WV05|A0A087WV05_HUMAN	33	12804	2 (1)	2 (1)	0.27	Uncharacterized protein OS=Homo sapiens OX=9606 PE=4 SV=1
122	sp|P30050|RL12_HUMAN	32	17979	3 (2)	2 (1)	0.19	60S ribosomal protein L12 OS=Homo sapiens OX=9606 GN=RPL12 PE=1 SV=1
123	tr|C9IZQ1|C9IZQ1_HUMAN	32	33866	1 (1)	1 (1)	0.1	Translocon-associated protein subunit alpha OS=Homo sapiens OX=9606 GN=SSR1 PE=1 SV=1
124	tr|H3BQ94|H3BQ94_HUMAN	32	17405	1 (1)	1 (1)	0.19	Neuroplastin (Fragment) OS=Homo sapiens OX=9606 GN=NPTN PE=1 SV=1
125	sp|Q15149|PLEC_HUMAN	32	533462	15 (1)	10 (1)	0.01	Plectin OS=Homo sapiens OX=9606 GN=PLEC PE=1 SV=3
126	tr|C9IZL7|C9IZL7_HUMAN	32	23715	5 (1)	2 (1)	0.14	Non-POU domain-containing octamer-binding protein (Fragment) OS=Homo sapiens OX=9606 GN=NONO PE=1 SV=1
127	tr|G3V3R6|G3V3R6_HUMAN	32	24128	3 (2)	2 (2)	0.3	Galectin OS=Homo sapiens OX=9606 GN=LGALS3 PE=1 SV=1
128	sp|Q7Z7A1|CNTRL_HUMAN	32	269860	8 (1)	5 (1)	0.01	Centriolin OS=Homo sapiens OX=9606 GN=CNTRL PE=1 SV=2
129	sp|Q9H6K4|OPA3_HUMAN	32	20155	1 (1)	1 (1)	0.17	Optic atrophy 3 protein OS=Homo sapiens OX=9606 GN=OPA3 PE=1 SV=1
130	sp|P62277|RS13_HUMAN	31	17212	5 (1)	3 (1)	0.2	40S ribosomal protein S13 OS=Homo sapiens OX=9606 GN=RPS13 PE=1 SV=2
131	tr|Q1JUQ5|Q1JUQ5_HUMAN	31	10112	2 (1)	1 (1)	0.34	Peptidylprolyl isomerase OS=Homo sapiens OX=9606 GN=FKBP1A PE=1 SV=1
132	sp|Q14764|MVP_HUMAN	31	99551	3 (1)	3 (1)	0.03	Major vault protein OS=Homo sapiens OX=9606 GN=MVP PE=1 SV=4
133	tr|J3KNA1|J3KNA1_HUMAN	31	107985	4 (2)	2 (1)	0.03	Kinesin-like protein OS=Homo sapiens OX=9606 GN=KIF5A PE=1 SV=1
134	tr|B3KWE1|B3KWE1_HUMAN	31	50162	2 (1)	2 (1)	0.07	Histidine--tRNA ligase, cytoplasmic OS=Homo sapiens OX=9606 GN=HARS PE=1 SV=1
135	sp|P59665|DEF1_HUMAN	31	10536	5 (1)	2 (1)	0.33	Neutrophil defensin 1 OS=Homo sapiens OX=9606 GN=DEFA1 PE=1 SV=1
136	tr|E7ENL6|E7ENL6_HUMAN	31	279429	14 (2)	11 (2)	0.02	Collagen alpha-3(VI) chain OS=Homo sapiens OX=9606 GN=COL6A3 PE=1 SV=2
137	sp|Q8WZ42|TITIN_HUMAN	31	3842904	30 (1)	28 (1)		Titin OS=Homo sapiens OX=9606 GN=TTN PE=1 SV=4
138	tr|A0A087WV68|A0A087WV68_HUMAN	30	24301	2 (1)	2 (1)	0.14	TAR DNA-binding protein 43 (Fragment) OS=Homo sapiens OX=9606 GN=TARDBP PE=1 SV=1
139	sp|P40926|MDHM_HUMAN	30	35937	5 (2)	5 (2)	0.19	Malate dehydrogenase, mitochondrial OS=Homo sapiens OX=9606 GN=MDH2 PE=1 SV=3
140	sp|P02787|TRFE_HUMAN	29	79294	3 (1)	3 (1)	0.04	Serotransferrin OS=Homo sapiens OX=9606 GN=TF PE=1 SV=3
141	tr|H3BPS8|H3BPS8_HUMAN	29	30693	3 (1)	3 (1)	0.11	Fructose-bisphosphate aldolase A (Fragment) OS=Homo sapiens OX=9606 GN=ALDOA PE=1 SV=1
142	tr|E9PLX7|E9PLX7_HUMAN	29	12526	3 (1)	3 (1)	0.27	60S ribosomal protein L27a OS=Homo sapiens OX=9606 GN=RPL27A PE=1 SV=1
143	sp|Q13228|SBP1_HUMAN	28	52928	4 (2)	4 (2)	0.13	Methanethiol oxidase OS=Homo sapiens OX=9606 GN=SELENBP1 PE=1 SV=2
144	sp|Q9HCC0|MCCB_HUMAN	28	61808	4 (1)	4 (1)	0.05	Methylcrotonoyl-CoA carboxylase beta chain, mitochondrial OS=Homo sapiens OX=9606 GN=MCCC2 PE=1 SV=1
145	sp|P07737|PROF1_HUMAN	28	15216	2 (1)	2 (1)	0.22	Profilin-1 OS=Homo sapiens OX=9606 GN=PFN1 PE=1 SV=2
146	tr|M0QYS1|M0QYS1_HUMAN	28	24258	4 (2)	2 (1)	0.14	60S ribosomal protein L13a (Fragment) OS=Homo sapiens OX=9606 GN=RPL13A PE=1 SV=2
147	tr|H3BM89|H3BM89_HUMAN	27	37861	3 (1)	3 (1)	0.09	60S ribosomal protein L4 OS=Homo sapiens OX=9606 GN=RPL4 PE=1 SV=1
148	sp|Q15652|JHD2C_HUMAN	27	286401	5 (1)	5 (1)	0.01	Probable JmjC domain-containing histone demethylation protein 2C OS=Homo sapiens OX=9606 GN=JMJD1C PE=1 SV=2
149	tr|H3BTN5|H3BTN5_HUMAN	27	53524	3 (1)	3 (1)	0.06	Pyruvate kinase (Fragment) OS=Homo sapiens OX=9606 GN=PKM PE=1 SV=1
150	tr|R4GN52|R4GN52_HUMAN	26	20099	1 (1)	1 (1)	0.17	Mesoderm-specific transcript homolog protein (Fragment) OS=Homo sapiens OX=9606 GN=MEST PE=1 SV=1
151	sp|P15880|RS2_HUMAN	20	31590	5 (3)	4 (3)	0.35	40S ribosomal protein S2 OS=Homo sapiens OX=9606 GN=RPS2 PE=1 SV=2
152	sp|Q9NRC6|SPTN5_HUMAN	26	419230	7 (1)	7 (1)	0.01	Spectrin beta chain, non-erythrocytic 5 OS=Homo sapiens OX=9606 GN=SPTBN5 PE=1 SV=2
153	tr|J3KN01|J3KN01_HUMAN	26	208516	3 (1)	3 (1)	0.02	Afadin OS=Homo sapiens OX=9606 GN=AFDN PE=1 SV=1
154	tr|E9PEB5|E9PEB5_HUMAN	26	69032	2 (1)	2 (1)	0.05	Far upstream element-binding protein 1 OS=Homo sapiens OX=9606 GN=FUBP1 PE=1 SV=1
155	tr|A0A087WXP2|A0A087WXP2_HUMAN	26	22636	1 (1)	1 (1)	0.15	Nuclear factor 1 B-type OS=Homo sapiens OX=9606 GN=NFIB PE=1 SV=1
156	tr|A0A0A0MTS2|A0A0A0MTS2_HUMAN	24	65012	1 (1)	1 (1)	0.05	Glucose-6-phosphate isomerase (Fragment) OS=Homo sapiens OX=9606 GN=GPI PE=1 SV=1
157	sp|P26373|RL13_HUMAN	24	24304	6 (1)	5 (1)	0.14	60S ribosomal protein L13 OS=Homo sapiens OX=9606 GN=RPL13 PE=1 SV=4
158	tr|V9GYZ6|V9GYZ6_HUMAN	23	109884	3 (1)	3 (1)	0.03	Bifunctional glutamate/proline--tRNA ligase (Fragment) OS=Homo sapiens OX=9606 GN=EPRS PE=1 SV=1
159	tr|E9PK25|E9PK25_HUMAN	23	22942	11 (1)	9 (1)	0.15	Cofilin-1 OS=Homo sapiens OX=9606 GN=CFL1 PE=1 SV=1
160	sp|P06733|ENOA_HUMAN	23	47481	7 (1)	7 (1)	0.07	Alpha-enolase OS=Homo sapiens OX=9606 GN=ENO1 PE=1 SV=2
161	tr|A0A0A0MSI0|A0A0A0MSI0_HUMAN	23	19135	4 (1)	4 (1)	0.18	Peroxiredoxin-1 (Fragment) OS=Homo sapiens OX=9606 GN=PRDX1 PE=1 SV=1
162	tr|J3KQE5|J3KQE5_HUMAN	23	27027	5 (2)	4 (2)	0.26	GTP-binding nuclear protein Ran (Fragment) OS=Homo sapiens OX=9606 GN=RAN PE=1 SV=1
163	sp|P15259|PGAM2_HUMAN	22	28919	5 (1)	4 (1)	0.11	Phosphoglycerate mutase 2 OS=Homo sapiens OX=9606 GN=PGAM2 PE=1 SV=3
164	sp|O95147|DUS14_HUMAN	22	22469	6 (1)	5 (1)	0.15	Dual specificity protein phosphatase 14 OS=Homo sapiens OX=9606 GN=DUSP14 PE=1 SV=1
165	sp|P62857|RS28_HUMAN	21	7893	2 (1)	2 (1)	0.45	40S ribosomal protein S28 OS=Homo sapiens OX=9606 GN=RPS28 PE=1 SV=1
166	sp|Q14204|DYHC1_HUMAN	21	534809	5 (1)	4 (1)	0.01	Cytoplasmic dynein 1 heavy chain 1 OS=Homo sapiens OX=9606 GN=DYNC1H1 PE=1 SV=5
167	tr|B7Z4C8|B7Z4C8_HUMAN	21	15166	2 (1)	2 (1)	0.22	60S ribosomal protein L31 OS=Homo sapiens OX=9606 GN=RPL31 PE=1 SV=1
168	sp|P26641|EF1G_HUMAN	21	50429	4 (1)	4 (1)	0.07	Elongation factor 1-gamma OS=Homo sapiens OX=9606 GN=EEF1G PE=1 SV=3
169	tr|B5MBZ0|B5MBZ0_HUMAN	21	111192	1 (1)	1 (1)	0.03	Echinoderm microtubule-associated protein-like 4 OS=Homo sapiens OX=9606 GN=EML4 PE=1 SV=3
170	tr|C9J0E4|C9J0E4_HUMAN	21	7082	1 (1)	1 (1)	0.5	Cystatin-A OS=Homo sapiens OX=9606 GN=CSTA PE=1 SV=1
171	tr|E7ESE2|E7ESE2_HUMAN	21	22442	2 (1)	1 (1)	0.15	Prohibitin (Fragment) OS=Homo sapiens OX=9606 GN=PHB PE=1 SV=2
172	tr|A0A0U1RQJ0|A0A0U1RQJ0_HUMAN	20	6141	1 (1)	1 (1)	0.59	Probable ATP-dependent RNA helicase DDX17 (Fragment) OS=Homo sapiens OX=9606 GN=DDX17 PE=1 SV=1
173	sp|Q00325|MPCP_HUMAN	20	40525	3 (1)	3 (1)	0.08	Phosphate carrier protein, mitochondrial OS=Homo sapiens OX=9606 GN=SLC25A3 PE=1 SV=2
174	tr|E7EQB2|E7EQB2_HUMAN	20	78459	2 (1)	2 (1)	0.04	Lactotransferrin (Fragment) OS=Homo sapiens OX=9606 GN=LTF PE=1 SV=1
175	sp|P50454|SERPH_HUMAN	20	46525	2 (1)	2 (1)	0.07	Serpin H1 OS=Homo sapiens OX=9606 GN=SERPINH1 PE=1 SV=2
176	tr|B5MCP9|B5MCP9_HUMAN	19	21299	2 (1)	2 (1)	0.16	40S ribosomal protein S7 OS=Homo sapiens OX=9606 GN=RPS7 PE=1 SV=1
177	tr|A0A0A0MQY8|A0A0A0MQY8_HUMAN	19	76650	3 (1)	2 (1)	0.04	Rap1 GTPase-activating protein 1 OS=Homo sapiens OX=9606 GN=RAP1GAP PE=1 SV=1
178	tr|J3KPA5|J3KPA5_HUMAN	19	63949	1 (1)	1 (1)	0.05	Transporter OS=Homo sapiens OX=9606 GN=SLC6A9 PE=1 SV=1
179	sp|Q9BV73|CP250_HUMAN	19	281880	8 (1)	7 (1)	0.01	Centrosome-associated protein CEP250 OS=Homo sapiens OX=9606 GN=CEP250 PE=1 SV=2
180	tr|A0A0A0MR02|A0A0A0MR02_HUMAN	18	30842	5 (1)	4 (1)	0.11	Voltage-dependent anion-selective channel protein 2 (Fragment) OS=Homo sapiens OX=9606 GN=VDAC2 PE=1 SV=1
181	tr|K7ELW0|K7ELW0_HUMAN	18	18070	1 (1)	1 (1)	0.19	Protein/nucleic acid deglycase DJ-1 OS=Homo sapiens OX=9606 GN=PARK7 PE=1 SV=1
182	tr|V9GYG0|V9GYG0_HUMAN	17	23042	3 (1)	2 (1)	0.15	ADP/ATP translocase 1 OS=Homo sapiens OX=9606 GN=SLC25A4 PE=1 SV=1
183	sp|P10809|CH60_HUMAN	17	61187	2 (1)	1 (1)	0.05	60 kDa heat shock protein, mitochondrial OS=Homo sapiens OX=9606 GN=HSPD1 PE=1 SV=2
184	tr|X6R9L0|X6R9L0_HUMAN	16	52336	1 (1)	1 (1)	0.06	DnaJ homolog subfamily C member 3 OS=Homo sapiens OX=9606 GN=DNAJC3 PE=1 SV=1
185	tr|U3KQR5|U3KQR5_HUMAN	16	17974	1 (1)	1 (1)	0.19	60S ribosomal protein L6 (Fragment) OS=Homo sapiens OX=9606 GN=RPL6 PE=1 SV=1
